# Supplementary material for: Implementation of the Assistive Product List (APL) in Malawi through development of appropriate policy and systems: an action research protocol
Source: PubMed Central journal article supplement — BMJ Open. 2020 Nov 6;10(11):e040281. doi: 10.1136/bmjopen-2020-040281 (PMC7651723; doi:10.1136/bmjopen-2020-040281), 2020-11-06
Supplement: bmjopen-2020-040281.draft_revisions.pdf [file bmjopen-2020-040281.draft_revisions.pdf]

# BMJ Open

BMJ Open is committed to open peer review. As part of this commitment we make the peer review history of every article we publish publicly available.

When an article is published we post the peer reviewers' comments and the authors' responses online. We also post the versions of the paper that were used during peer review. These are the versions that the peer review comments apply to.

The versions of the paper that follow are the versions that were submitted during the peer review process. They are not the versions of record or the final published versions. They should not be cited or distributed as the published version of this manuscript.

BMJ Open is an open access journal and the full, final, typeset and author-corrected version of record of the manuscript is available on our site with no access controls, subscription charges or pay-per-view fees (<http://bmjopen.bmj.com>).

If you have any questions on BMJ Open's open peer review process please email [info.bmjopen@bmj.com](mailto:info.bmjopen@bmj.com)

# BMJ Open

## Action Research and Empowering Users in Assistive Technology in Malawi; Protocol for the APPLICABLE project

|                               |                                                                                                                                                                                                                                                                                                                                                                                                                                     |
|-------------------------------|-------------------------------------------------------------------------------------------------------------------------------------------------------------------------------------------------------------------------------------------------------------------------------------------------------------------------------------------------------------------------------------------------------------------------------------|
| Journal:                      | <i>BMJ Open</i>                                                                                                                                                                                                                                                                                                                                                                                                                     |
| Manuscript ID                 | bmjopen-2020-040281                                                                                                                                                                                                                                                                                                                                                                                                                 |
| Article Type:                 | Protocol                                                                                                                                                                                                                                                                                                                                                                                                                            |
| Date Submitted by the Author: | 09-May-2020                                                                                                                                                                                                                                                                                                                                                                                                                         |
| Complete List of Authors:     | Ebuenyi, Ikenna; National University of Ireland Maynooth, Psychology<br>Smith, Emma; National University of Ireland Maynooth, Psychology<br>Kafumba, Juba; University of Malawi, Centre for Social Research<br>Jamali, Monica; University of Malawi, Centre for Social Research<br>Munthali, Alister; University of Malawi, Centre for Social Research<br>MacLachlan, Malcolm ; National University of Ireland Maynooth, Psychology |
| Keywords:                     | REHABILITATION MEDICINE, PUBLIC HEALTH, SOCIAL MEDICINE, Health policy < HEALTH SERVICES ADMINISTRATION & MANAGEMENT                                                                                                                                                                                                                                                                                                                |
|                               |                                                                                                                                                                                                                                                                                                                                                                                                                                     |

SCHOLARONE™  
Manuscripts

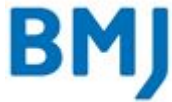

I, the Submitting Author has the right to grant and does grant on behalf of all authors of the Work (as defined in the below author licence), an exclusive licence and/or a non-exclusive licence for contributions from authors who are: i) UK Crown employees; ii) where BMJ has agreed a CC-BY licence shall apply, and/or iii) in accordance with the terms applicable for US Federal Government officers or employees acting as part of their official duties; on a worldwide, perpetual, irrevocable, royalty-free basis to BMJ Publishing Group Ltd ("BMJ") its licensees and where the relevant Journal is co-owned by BMJ to the co-owners of the Journal, to publish the Work in this journal and any other BMJ products and to exploit all rights, as set out in our [licence](#).

The Submitting Author accepts and understands that any supply made under these terms is made by BMJ to the Submitting Author unless you are acting as an employee on behalf of your employer or a postgraduate student of an affiliated institution which is paying any applicable article publishing charge ("APC") for Open Access articles. Where the Submitting Author wishes to make the Work available on an Open Access basis (and intends to pay the relevant APC), the terms of reuse of such Open Access shall be governed by a Creative Commons licence – details of these licences and which [Creative Commons](#) licence will apply to this Work are set out in our licence referred to above.

Other than as permitted in any relevant BMJ Author's Self Archiving Policies, I confirm this Work has not been accepted for publication elsewhere, is not being considered for publication elsewhere and does not duplicate material already published. I confirm all authors consent to publication of this Work and authorise the granting of this licence.

1  
2  
3  
4 Action Research and Empowering Users in Assistive Technology in Malawi; Protocol for  
5 the APPLICABLE project  
6  
7  
8  
9

10 Ikenna D Ebuenyi,<sup>1</sup> Emma M Smith,<sup>1</sup> Juba Kafumba,<sup>2</sup> Monica Z Jamili,<sup>2</sup> Alister Munthali,<sup>2</sup>  
11 Malcolm MacLachlan<sup>1</sup>  
12  
13

14  
15 <sup>1</sup>ALL Institute and Department of Psychology, Maynooth University, Maynooth, Ireland  
16  
17

18 <sup>2</sup>Centre for Social Research, University of Malawi, Zomba, Malawi  
19  
20  
21  
22  
23  
24  
25

26 Correspondence to: Dr. Ikenna D Ebuenyi; [Ikenna.ebuenyi@mu.ie](mailto:Ikenna.ebuenyi@mu.ie)  
27  
28  
29  
30  
31  
32  
33  
34  
35  
36  
37  
38  
39  
40  
41  
42  
43  
44  
45  
46  
47  
48  
49  
50  
51  
52  
53  
54  
55  
56  
57  
58  
59  
60

1  
2  
3  
4  
5  
6  
7  
8  
9  
10  
11  
12  
13  
14  
15  
16  
17  
18  
19  
20  
21  
22  
23  
24  
25  
26  
27  
28  
29  
30  
31  
32  
33  
34  
35  
36  
37  
38  
39  
40  
41  
42  
43  
44  
45  
46  
47  
48  
49  
50  
51  
52  
53  
54  
55  
56  
57  
58  
59  
60

For peer review only

Abstract

Introduction

Assistive Technology (AT) is important for the achievement of the Sustainable Development Goals (SDGs) for persons with disabilities (PWD). Increasingly, studies suggest a significant gap between the need for and demand for and provisions of AT for PWD in low- and middle-income settings. Evidence from high income countries highlights the importance of robust AT policies to

1  
2  
3 the achievement of the recommendations of the World Health Assembly on AT. In Malawi, there  
4  
5 is no standalone AT policy. The objectives of the priority Assistive Product list Implementation  
6  
7 Creating Enablement of inclusive SDGs (APPLICABLE) project, are to propose and facilitate the  
8  
9 development of a framework for creating effective national Assistive Technology (AT) policy and  
10  
11 specify a system capable of implementing that policy such policies in low-income countries such  
12  
13 as Malawi.  
14  
15  
16  
17

### 18 Method and analysis

19  
20 We propose an action research process with stakeholders in AT in Malawi. APPLICABLE will  
21  
22 adopt an action research paradigm, through developing a shared research agenda with  
23  
24 stakeholders and including users of AT. This involves the formation of an Action Research Group  
25  
26 (ARG) that will specify the priorities for practice - and policy-based evidence, in order to facilitate  
27  
28 the development of contextually realistic and achievable policy aspirations on AT in Malawi and  
29  
30 provide system strengthening recommendations that will ensure that the policy is  
31  
32 implementable/implemented for their realization. We will undertake an evaluation of this policy by  
33  
34 measuring supply and support for specific AT prior to, and following the implementation of the  
35  
36 policy recommendations.  
37  
38  
39  
40  
41  
42

### 43 Ethics and Dissemination

44  
45 The Maynooth University Research Ethics Committee approved the study protocol (SRESC-2019-  
46  
47 2378566) while ethical approval is being awaited from the University of Malawi Research Ethics  
48  
49 Committee. Findings from the study will be disseminated by publication in peer-reviewed journals,  
50  
51 presentations to stakeholders in Malawi, Ireland, and international audiences at international  
52  
53 conferences.  
54  
55  
56  
57

1  
2  
3  
4  
5  
6 **Keywords:** Action Research, Assistive Technology Policy, Assistive Product List, Collective  
7  
8 Leadership, Malawi  
9

#### 10 11 12 13 14 **Strength and Limitations of this Study** 15

- 16 ➤ This study will be the first in Africa to explore the development of a national Assistive  
17  
18 Technology policy and Assistive Product list in response to the recommendations of the  
19  
20 WHO.  
21  
22
- 23 ➤ The framework developed from this study, will lead to strengthening of the Assistive  
24  
25 Technology ecosystem in Malawi and may be relevant in other countries with similar  
26  
27 interest.  
28  
29
- 30 ➤ Using an emergent and action learning approach strengthens both the methods and  
31  
32 reflexivity of the research process and ensures active participation of all stakeholders.  
33  
34
- 35 ➤ The use of a flexible research methodology may lead to researcher bias and deviation from  
36  
37 the initial objectives may occur on account of the reliance on the contribution from multiple  
38  
39 stakeholders.  
40  
41
- 42 ➤ The proposed principle of collective leadership may be a hard sell to the stakeholders in  
43  
44 government who are used to the traditional single ministry lead in policy development.  
45  
46  
47  
48  
49  
50  
51  
52  
53  
54  
55  
56  
57

## Introduction

Persons with disabilities (PWD) often experience overt and covert barriers to participation in society and exercise of their rights.<sup>1</sup> These experiences of deprivation have dire implications for PWD, depending on their location and type of impairment. This realization has led to various efforts at both national and international level to ensure the reduction and elimination of the deprivation experience by PWD.<sup>1, 2</sup> The United Nations Convention on the Rights of Persons with Disabilities (UN CRPD) and the Sustainable Development Goals (SDGs) emphasize the importance of inclusion for PWD.<sup>3, 4</sup> The SDGs highlight the importance of social inclusion through the slogan- 'leave no one behind'.

Assistive Technology (AT) is pivotal to achieving this mandate of inclusion of PWD.<sup>4, 5</sup> AT is a 'subset of health technology and systems refers to "the development and application of organised knowledge, skills, procedures, and policies relevant to the provision, use, and assessment of assistive products".<sup>6</sup> while an assistive product is "any product (including devices, equipment, instruments, and software), either specially designed and produced or generally available, whose primary purpose is to maintain or improve an individual's functioning and independence and thereby promote their wellbeing".<sup>6</sup> Common examples of assistive products in different impairment domains include wheelchairs, white canes, hearing aids, communication boards and calendar pill boxes. In 2014, the WHO established the Global Cooperation on Assistive Technology (GATE) in order to address the global need for AT.<sup>7</sup> One of the first tasks for GATE was to establish a Priority Assistive Product List (APL)<sup>8</sup> which called for countries to develop their own context specific national APL, similar to the WHO



1  
2  
3 Essential medicines list.<sup>9</sup> The APL is not restrictive but a guide provided by GATE for countries  
4  
5  
6 to use in identifying national AT needs and priorities.<sup>8</sup>  
7  
8  
9

10 In a bid to improve access to AT , GATE recommended five priority (5Ps) themes, namely people,  
11  
12 policy, products, provision and personnel.<sup>8</sup> That schema put *people*, or users of AT, at the centre  
13  
14 and policy, products, provision and personnel, as strategic points of action to improve access to  
15  
16 AT around the world. In a series of position papers from the Global Research, Innovation and  
17  
18 Education on Assistive Technology (GREAT) summit organized by GATE, people were identified  
19  
20 as important drivers in AT access;<sup>10</sup> context sensitive products were considered relevant for AT  
21  
22 accessibility;<sup>11</sup> the development of an international standard for provision of AT was seen as  
23  
24 important for service user safety,<sup>12</sup> and the certification of competency for AT personnel as  
25  
26 important for staff training,<sup>13</sup> along with an inclusive development of national AT policies, all to  
27  
28 improve access to AT.<sup>14</sup> Along with these papers, an additional 5 Ps – specifically referring to the  
29  
30 context of AT services were also identified as emergent from the discussions at the Summit (see  
31  
32 Figure 1)  
33  
34  
35  
36  
37  
38  
39  
40  
41

42 **Figure 1: The 10 Ps of Systems Thinking for Assistive Technology Adapted from MacLachlan**  
43  
44 **& Scherer, 2018, with permission)**  
45  
46  
47  
48

49 Stermann suggests that it is not a lack of resources, technical knowledge or commitment that  
50  
51 prevents us from making improvements in public health services but rather, “What thwarts us  
52  
53 is our lack of meaningful systems thinking capability”.<sup>15</sup> Specifically in relation to AT,  
54  
55  
56  
57

1  
2  
3 MacLachlan and Scherer argue that “a systems thinking approach allows for a meaningful  
4 linking of components and processes, a more realistic understanding of why and where  
5 initiatives might fail or succeed, and a more satisfying way of placing the user of assistive  
6 technology at the centre of ideas, activities and outcomes.”<sup>16</sup>  
7  
8  
9  
10  
11  
12  
13  
14

### 15 The Malawi Context

16  
17 Increasingly, studies suggest low demand and provision of Assistive Technology (AT) for  
18 PWD in low- and middle-income settings.<sup>17</sup> Malawi is a Southern African country with a  
19 population of about 18 million. The economy is largely agrarian, and the government depends  
20 on foreign aid. Malawi ranks 172 out of 189 countries based on the United Nations Human  
21 Development Index.<sup>18</sup> In Malawi, there are several policies and strategies at the national level  
22 which are relevant to the experiences of PWD, each which should have relevance to AT.  
23  
24 Notably, the National Policy on the Equalization of Opportunities for PWD<sup>19</sup> and National  
25 Disability Mainstreaming Strategy and Implementation Plan,<sup>20</sup> yet there are no clear direction  
26 guidelines on how AT should be provided in the country<sup>20</sup>. It is pertinent to state that the  
27 National Policy on the Equalization of Opportunities for Persons with Disabilities was adopted  
28 in 2006; and processes are under way to develop a successor plan on account of its expiration.  
29  
30 In Malawi, there is a huge gap between the need and access to services PWD.<sup>21</sup> Although  
31 about 69% of PWD need assistive devices in Malawi, only 5% have access to them.<sup>22</sup>  
32  
33 Evidence from high income countries highlights the importance of robust AT policies for the  
34 achievement of the recommendations of the WHA on AT.<sup>23</sup> In Malawi, there is no standalone  
35 AT policy.<sup>24</sup>  
36  
37  
38  
39  
40  
41  
42  
43  
44  
45  
46  
47  
48  
49  
50  
51  
52  
53  
54  
55  
56  
57  
58  
59  
60

1  
2  
3  
4  
5  
6 The objectives of the Assistive Product List Implementation Creating Enablement of inclusive  
7  
8 SDGs (APPLICABLE) project are (i) to propose and facilitate the development of *a framework*  
9  
10 for creating effective national Assistive Technology (AT) policy and (ii) *specify a system*  
11  
12 capable of implementing that policy in Malawi.  
13  
14  
15

## 16 Methods and Analysis

### 17 Approach

18  
19 The study will adopt an action research approach<sup>25</sup> and shared research agenda in  
20  
21 collaboration with AT stakeholders in Malawi to achieve the study objectives. Hence, this  
22  
23 research protocol is based on a proposed research plan by the research teams at Maynooth  
24  
25 University and the University of Malawi and the discussions held during the project launch and  
26  
27 formation of an Action Research Group (ARG) in Malawi.  
28  
29  
30

31  
32 The relevance of action research for solving persistent problems has been extensively  
33  
34 reported.<sup>25</sup> Boger et al recommend collaborative transdisciplinary approach for solving  
35  
36 persistent problems in AT.<sup>26</sup> In adopting this method, we aim to ensure that the process of AT  
37  
38 policy development is participatory, collaborative and undertaken through a transparent and  
39  
40 reflexive process with relevant stakeholders in Malawi. Equally essential is the relevance of  
41  
42 the action research paradigm to the systems-thinking and mission-oriented approach which  
43  
44 are central to the objectives of APPLICABLE. A systems thinking approach will ensure  
45  
46 APPLICABLE focuses on the range of Ps (described above) to bridge the AT systems Gap in  
47  
48 Malawi.<sup>16, 27</sup> 'Collective leadership' will be a guiding principle for the research, whereby all the  
49  
50 participating ministries and other major stakeholders, take active leadership in the project in  
51  
52 order to engender collective impact which is supported by research. According to De Bruin et  
53  
54  
55  
56  
57  
58  
59  
60

1  
2  
3 al., collective leadership was associated with improved communication and role clarity, greater  
4  
5 willingness to adopt leadership roles and 'give and take' by leaders, who became more willing  
6  
7 to share leadership responsibilities.<sup>28</sup> Also, Michaud-Létourneau suggest that the approach is  
8  
9 useful for changing policy where many stakeholders exist.<sup>29</sup>  
10  
11  
12  
13  
14

15 The specific research methods described below are tactical and will be decided by and with the  
16  
17 ARG in an iterative process through a series of phases, each comprised of Action Research  
18  
19 Cycles. The content for each of those action research cycles will be decided in consultation with  
20  
21 key stakeholders in AT in Malawi through the formation of an Action Research Group (ARG). The  
22  
23 five phases of the research are Preparatory Work, Policy Development, Systems Development,  
24  
25 Implementation and Evaluation, and Knowledge Exchange (Figure 2).  
26  
27  
28  
29  
30  
31  
32  
33

## 34 **Figure 2: APPLICABLE research phases**

35  
36  
37  
38

### 39 **Formative Research**

40 As part of the formative research process, Initial meetings were held with the Ministries of Gender,  
41  
42 Children, Disability and Social Welfare (MoGCD&SW), Health, Education, and Labour, Disabled  
43  
44 People's Organisations, other civil society, service providers, donors, industry and UN agencies.  
45  
46 Presentation and discussions on establishing a AT policy and implementation systems in Malawi  
47  
48 were discussed and the stakeholders expressed interest in the project.  
49  
50  
51 The project launch was held on the 6<sup>th</sup> of December 2019 with over 40 stakeholders drawn from  
52  
53 five broad stakeholders groups namely:  
54  
55  
56  
57  
58  
59  
60

- 1
- 2
- 3
- 4 1. Government Stakeholders (e.g. Ministries of Health, Education, Gender and Persons with
- 5 Disabilities and the Elderly)
- 6
- 7
- 8 2. Non-governmental non-profit stakeholders (e.g. Federation of Disability Organization in
- 9 Malawi (FEDOMA), and Beit Cure International Hospital (BT) Malawi Council for the
- 10 handicapped (MACOHA))
- 11
- 12
- 13 3. Non-governmental for-profit stakeholders (Pharmacist, Physiotherapist)
- 14
- 15
- 16 4. Academic Institutions
- 17
- 18
- 19 5. United Nation agencies (e.g. UNICEF, WHO, UNDP)
- 20
- 21
- 22
- 23
- 24

25 Following the project launch, 15 persons were invited from the stakeholders present to join the  
26  
27 ARG.

28  
29 The ARG adopted the proposed process and agreed that:

- 30
- 31
- 32 • A realistic AT policy and delivery system is needed in Malawi.
- 33
- 34 • That ownership of the policy will be further discussed and that initially it will be co-led by
- 35 members of the Action Research Group.
- 36
- 37
- 38
- 39 • Data will be stored at the Centre for Social Research, Malawi.
- 40
- 41

42 The launch was organized in collaboration with Clinton Health access Initiative (CHAI) who  
43 previously conducted a baseline survey on AT in Malawi. They presented the results on their  
44 survey after which APPLICABLE was introduced by the Principal investigators from Malawi and  
45 Ireland. This was followed by reactions from stakeholders and selection of the ARG from the  
46 stakeholders' present. The discussions with the ARG, informed the proposed research phases  
47  
48  
49  
50  
51  
52  
53  
54 (Table 1):

1  
2  
3  
4  
5  
6 *Phase 1- Preparatory Work*. This stage starts with the project launch and formation of the Action  
7  
8 Research Group (ARG). Members of the ARG have been purposively selected to work on the  
9  
10 policy development and implementation. The nature of action research is that the methodology of  
11  
12 the group is decided upon by the group and is likely to change and evolve as they address different  
13  
14 issues.<sup>25</sup> Following an action research approach, the group will thus **plan** what to do – take clear  
15  
16 and specific **action – observe** and collect data on the consequences of this action – and as a group  
17  
18 **reflect** on the implications for designing policy to and systems to promote access to AT. In order  
19  
20 to conduct preparatory work, we will conduct a literature review of academic and grey literature in  
21  
22 assistive technology in Malawi and review data available from existing datasets. The research  
23  
24 team will also assess inclusivity of the process of policy development and implementation in  
25  
26 existing policies using the EquIPP(Equity and Inclusion in Policy Processes) tool.<sup>30</sup> We will also  
27  
28 support a country capacity assessment being completed in collaboration with other ongoing  
29  
30 projects in Malawi.  
31  
32  
33  
34  
35  
36  
37  
38

39 Phase 2 – Policy Development: Phase 2 will focus on the development of a draft policy, guided by  
40  
41 the EquIPP framework for inclusive policy development. A theory of change<sup>31</sup> will be undertaken  
42  
43 to guide the APL development while Force Field Analysis<sup>32</sup> to explore the political economy and  
44  
45 power relationships on AT in Malawi would be conducted.  
46  
47  
48  
49  
50

51 The ARG will design a Draft AT Policy, supported by the research team; drawing on the literature  
52  
53 reviewed above and taking into account the Malawian context. It is anticipated that the resultant  
54  
55  
56  
57

1  
2  
3 draft may also be assessed for the degree to which it promotes inclusivity (e.g. service users,  
4 gender, rurality, poverty, etc.) using the EquiFrame tool.<sup>33</sup>  
5  
6  
7  
8  
9

10 *Phase 3-System Development:* This phase involves the development of system strengthening  
11 recommendations based on knowledge and information generated from the policy development  
12 process. The ARG will also address what implications there are at the systems level for delivering  
13 on the Draft AT Policy; and to recommend how these can be addressed in the Malawian context.  
14 Data would be used to demonstrate the link between the different government ministries and  
15 stakeholders to the SDG matrix; and thus highlight the relevance of AT to achievement of the  
16 SDGs.<sup>4</sup> A network analysis<sup>34, 35</sup> would be undertaken to explore the strength and nature of  
17 relationship between stakeholders on AT in Malawi. The collective leadership approach will be  
18 very useful in this phase to ensure collective impact and system development.<sup>36</sup>  
19  
20  
21  
22  
23  
24  
25  
26  
27  
28  
29  
30  
31  
32  
33

34 *Phase 4- Implementation and Evaluation:* This phase marks the beginning of the implementation  
35 and evaluation of the AT policy developed. Over an agreed period, the participating government  
36 ministries and stakeholders will identify a suitable service provider to trial the implementation of  
37 the Draft AT Policy, with the support of the identified ministry and the research team. While the  
38 ARG will be in a continuing process of evaluation and feedback themselves, stakeholders who  
39 attended the project launch will be asked to attend a project review meeting where the ARG and  
40 research team will present findings. The ARG will also identify AT service users to present their  
41 experiences during this workshop. The SMART (Systems-Market for Assistive and Related  
42 Technologies) Thinking Matrix framework will be used during the implementation and evaluation.<sup>37</sup>  
43  
44  
45  
46  
47  
48  
49  
50  
51  
52  
53  
54  
55  
56  
57  
58  
59  
60

1  
2  
3  
4  
5  
6 *Phase 5-Knowledge Exchange:* This phase entails ensuring knowledge exchange impact of the  
7  
8 research process. The ARG and the Research Team will use results from previous phases to  
9  
10 identify key features that might be relevant for a generic National Framework for AT, that will be  
11  
12 generalised to other countries and contexts. In keeping with Action Research methodology, expert  
13  
14 advisers (all of whom we have worked with before) who will be available to provide support to the  
15  
16 ARG shall provide feedback on the research process. This support could be provided either  
17  
18 virtually or through attendance at project meeting in Malawi; as determined by the needs of the  
19  
20 ARG and the available budget of the project.  
21  
22  
23  
24  
25  
26

### 27 Action Research Methodology

28  
29 Throughout the five phases described above, we will use an Action Research Methodology<sup>25</sup>  
30  
31 informed by the needs of the ARG. This will take the form of Action Research Cycles each  
32  
33 consisting of four components: plan, act, observe, and reflect (Figure 3), to answer the research  
34  
35 questions which are posed by the ARG, and contribute to the development of each phase.  
36  
37  
38  
39  
40  
41  
42  
43  
44  
45  
46

### 47 **Figure 3. Action Research Process**

48  
49  
50  
51 Throughout these cycles, we will use multiple study methods to address the questions posed by  
52  
53 the ARG (Table 1). For each research methodology, specific study procedures (Table 1) to  
54  
55  
56  
57  
58  
59  
60



produce requested content for use in the action research cycle will be decided in consultation with the ARG.

**Table 1: Planned and anticipated research methodology**

| Research Phase                                                                                | Methodology                                                                                                                                                                                                                                                                                                                                                                                                                                                                                                  |
|-----------------------------------------------------------------------------------------------|--------------------------------------------------------------------------------------------------------------------------------------------------------------------------------------------------------------------------------------------------------------------------------------------------------------------------------------------------------------------------------------------------------------------------------------------------------------------------------------------------------------|
| <b>Phase 1 - Preparatory Work: Understanding the Assistive technology context in Malawi</b>   | <ol style="list-style-type: none"> <li>1. <b>Literature Review:</b> Assistive technology service delivery and policy review using academic and grey literature</li> <li>2. <b>Data Review:</b> Secondary data analysis of existing datasets (i.e. Census, SINTEF dataset)</li> <li>3. <b>Country Capacity Assessment:</b> In collaboration with AT2030 and the Clinton Health Access Initiative</li> <li>4. <b>EquiPP:</b> Review of existing policies for inclusive policy development processes</li> </ol> |
| <b>Phase 2 – Policy Development: Identifying Key Change Agents and Contexts</b>               | <ol style="list-style-type: none"> <li>5. <b>EquiPP:</b> Inclusive policy development process</li> <li>6. <b>Theory of Change:</b> Development of theory of change for APL development</li> <li>7. <b>Field Analysis:</b> Force Field Analysis and Bourdesian Analysis to understand political economy and power relationships</li> </ol>                                                                                                                                                                    |
| <b>Phase 3 - Systems Development: Engagement in Collective Leadership to Achieve the SDGs</b> | <ol style="list-style-type: none"> <li>8. <b>SDG Matrix:</b> Linking ministries to SDG achievement and role of AT</li> <li>9. <b>Network Analysis:</b> Strength and nature of existing networks between key stakeholders in AT in Malawi</li> </ol>                                                                                                                                                                                                                                                          |
| <b>Phase 4 – Implementation and Evaluation: Delivering a Policy</b>                           | <ol style="list-style-type: none"> <li>10. <b>Systems Coherence Development:</b> Addressing gaps in existing network to strengthen coherence for GATE 10Ps</li> <li>11. <b>Market Shaping Analysis:</b> Smart Thinking Matrix</li> </ol>                                                                                                                                                                                                                                                                     |

|                                                                                               |                                                                                                                                                                                                                                           |
|-----------------------------------------------------------------------------------------------|-------------------------------------------------------------------------------------------------------------------------------------------------------------------------------------------------------------------------------------------|
| <p>or Strategy in<br/>Context</p>                                                             | <p>12. <b>Piloting:</b> Implementation of strategy in key areas with review of process and outcomes</p>                                                                                                                                   |
| <p>Phase 5 –<br/>Knowledge<br/>Exchange: Applying<br/>Knowledge to the<br/>Global Context</p> | <p>13. <b>Policy Framework:</b> Identification of key concepts for broader applicability to other contexts</p> <p>14. <b>Systems Implementation Framework:</b> Specification of implementation system to be applied to other contexts</p> |

### Data collection and Management

All data including the transcripts will be stored according to the provisions of the Centre for Social Research, University of Malawi Research Practice and Procedures. Hence, all primary data will be held permanently following its acquisition and used in publication for the purpose of this study and recommendations of the ARG. All data will be anonymized and informed consent will be obtained from all study participants. A data dictionary will be kept and maintained for both quantitative and qualitative data to ensure that all authorized individuals are able to reuse the data. Secondary data would be obtained from National the Statistics Office and National Survey on living conditions of persons with disabilities (SINTEF).

### Data Analysis

Quantitative data will be analysed using the Statistical Package for the Social Sciences (SPSS) version 23 while qualitative data will be analysed via *Atlas. ti version 7.5.18*. All data will be anonymized and not contain any personal identifiers. For qualitative data, content and framework analysis will be used while for quantitative data, descriptive statistics and regression analysis will

1  
2  
3 be undertaken to understand factors relevant for improved access to AT and creation of a nation  
4  
5  
6 AT policy in Malawi.

7  
8 The following tools would also be used to analyze the policy developed:  
9

- 10 • EquiPP<sup>30</sup> developed with the United Nations Partnership on the Rights of Persons with  
11  
12 Disabilities (UNPRPD) and which measures, evaluates and makes recommendations for  
13  
14 improvement in regard to inclusive policy development and evaluation  
15  
16
- 17 • EquiFrame<sup>33</sup> which is a tool for Evaluating and Promoting the Inclusion of Vulnerable  
18  
19 Groups and Core Concepts of Human Rights in Health Policy Documents  
20  
21  
22  
23  
24  
25  
26

### 27 Ethics and Dissemination

28  
29 Ethical approval (SRESC-2019- 2378566) was obtained from the Maynooth University Social  
30  
31 Research Ethics Committee while the research protocol has been submitted for approval to the  
32  
33 University of Malawi Research Ethics Committee (UNIMAREC) for local ethical approval.  
34  
35

36 The results from the study will be disseminated through presentations at conferences both  
37  
38 within Malawi and abroad with stakeholders in and at international conferences; and publishing  
39  
40 in peer-reviewed journals and on the websites of Maynooth and University of Malawi  
41  
42  
43  
44  
45  
46  
47  
48  
49  
50  
51  
52  
53  
54  
55  
56  
57  
58  
59  
60

## Discussion

The aim of APPLICABLE is to develop a national AT policy for Malawi and to contribute to the development of a framework in the process that may be relevant in other countries. Also, it is anticipated that the process will evolve a framework that will lead to strengthening of the AT ecosystem through collaborative action and partnership with all stakeholders.

These objectives informed the adoption of the Action Research approach that sets out on a research path without specific research agenda but entrusts the direction of the research to local and informed actors on AT in Malawi, to ensure a shared research agenda and development of context useful knowledge. This approach is in line with the ethos of the Mission Oriented Approach for AT proposed by Albala and colleagues.<sup>27</sup> It also avoids the common pitfall of most implementation research, where research is done for rather than with local stakeholders. Also, the action research approach ensures the development of context specific approaches for the development of APL for Malawi. Low income settings like Malawi have particular AT challenges that must take into consideration the local realities rather than adopting recommendations from high income settings with different socio-economic milieu. According to Gélinas-Bronsard and colleagues, accessing AT is a matter of resources.<sup>38</sup> While it is obvious that factors outside finance play a role in the access and utilization of AT, its pivotal role in LMICS, where health care insurance and social welfare packages are absent, is a key issue that the action research approach must explicitly address.

The Collective Leadership approach will help to ensure all stakeholders engaged in the action research approach feel a sense of ownership and promote buy-in at all levels in the

1  
2  
3 implementation phase. Historically, in Malawi and in other countries, a single ministry  
4 maintains responsibility for the development and implementation of policy – considered the  
5 policy holder. In this case, either the ministry of Health or Gender and disability or Education  
6 may desire to claim ownership on account of perceived ‘proximity’ of AT to their ministry.  
7  
8 However, AT is more than just a health issue, or disability problem as shown by data from our  
9  
10  
11  
12  
13  
14  
15  
16  
17  
18  
19  
20  
21  
22  
23  
24  
25  
26  
27  
28  
29  
30  
31  
32  
33  
34  
35  
36  
37  
38  
39  
40  
41  
42  
43  
44  
45  
46  
47  
48  
49  
50  
51  
52  
53  
54  
55  
56  
57  
58  
59  
60

implementation phase. Historically, in Malawi and in other countries, a single ministry maintains responsibility for the development and implementation of policy – considered the policy holder. In this case, either the ministry of Health or Gender and disability or Education may desire to claim ownership on account of perceived ‘proximity’ of AT to their ministry. However, AT is more than just a health issue, or disability problem as shown by data from our SDG matrix. It cuts across various sectors such as education, sports and therefore require collaborative approach. As shown by Tebbut and colleagues, AT is relevant for the achievement of each of the 17 SDGs;<sup>5</sup> hence requires cross cutting collaboration between all players in Malawi. Interestingly, the collective leadership approach is noted to be useful for changing policy where many stakeholders exist and led to relevant policy changes in infant and young child feeding policies in seven countries in Southeast Asia.<sup>29</sup> Similarly, a systematic review by De Brun and colleagues showed that collectivistic leadership was associated positive outcomes in health care settings in Europe and North America.<sup>28</sup> It is pertinent to note that in order to solve social problems and achieve collective impact, commitment of all relevant actors is crucial<sup>36</sup>. This integration between systems thinking and market shaping approach presents as practical and viable option to increase access to AT.<sup>37</sup>

The strength of this study lies in its reliance on the Action Research method which ensures active participation of all stakeholders. Yet, the task of managing the interest of the ‘many’ and ensuring that every opinion counts will be a big challenge of the research process.

## Conclusion

Gaps between research and practice or policy and practice gaps are some of the persistent problems in disability studies. In adopting an action research process, we intend to avoid these gaps to evolve a participatory and innovative process leading to development of an implementable AT policy in Malawi. The benefit of an AT policy in Malawi are numerous. However, a realistic and implementable policy would overcome the limitations of past policies on disability in Malawi that failed to address the health and social challenges of PWD. APPLICABLE present as an opportunity to demonstrative an innovative and participatory way of policy development that may be adapted for use in other settings.

## Acknowledgement

We are grateful to the members of APPLICABLE action research group.

## Author Contributions

IDE and MM conceptualized the protocol with significant contributions from EMS and AM. IDE wrote the initial draft which was reviewed by EMS, JF, MZJ, AM and MM. All authors read and approved the final version of the manuscript.

## Funding

This work was supported by funding from the Irish Research Council (IRC) grant number-COALESCE/2019/114.

## Competing interests

None declared.

1  
2  
3  
4  
5  
6  
7  
8  
9  
10  
11  
12  
13  
14  
15  
16  
17  
18  
19  
20  
21  
22  
23  
24  
25  
26  
27  
28  
29  
30  
31  
32  
33  
34  
35  
36  
37  
38  
39  
40  
41  
42  
43  
44  
45  
46  
47  
48  
49  
50  
51  
52  
53  
54  
55  
56  
57  
58  
59  
60

For peer review only



## References

1. World Health Organization. World report on disability. 2011 World Disability Report. 2016.
2. Bright T, Wallace S, Kuper H. A systematic review of access to rehabilitation for people with disabilities in low-and middle-income countries. *Int J Environ Res Public Health*. 2018;15(10):2165.
3. Convention on the Rights of Persons with Disabilities (CRPD) [Internet]. 2006 [cited February 2020]. Available from: <https://www.un.org/development/desa/disabilities/convention-on-the-rights-of-persons-with-disabilities.html>.
4. Sustainable Development Goals [Internet]. 2020 [cited February 2020]. Available from: <http://www.undp.org/content/undp/en/home/sustainable-development-goals.html>.
5. Tebbutt E, Brodmann R, Borg J, MacLachlan M, Khasnabis C, Horvath R. Assistive products and the sustainable development goals (SDGs). *Globalization and health*. 2016;12(1):79.
6. Khasnabis C, Mirza Z, MacLachlan M. Opening the GATE to inclusion for people with disabilities. *The Lancet*. 2015.
7. World Health Organization. Global cooperation on assistive technology (GATE). World Health Organization, Geneva. 2014.
8. World Health Organization. Priority Assistive Products List (APL). Geneva: WHO, 2016.
9. World Health Organization. WHO model list of essential medicines: 17th list, March 2011. 2011.
10. Desmond D, Layton N, Bentley J, Boot FH, Borg J, Dhungana BM, et al. Assistive technology and people: a position paper from the first global research, innovation and education

1  
2  
3 on assistive technology (GREAT) summit. Disability and Rehabilitation: Assistive Technology.  
4  
5  
6 2018;13(5):437-44.  
7

8 11. Smith RO, Scherer MJ, Cooper R, Bell D, Hobbs DA, Pettersson C, et al. Assistive  
9  
10 technology products: a position paper from the first global research, innovation, and education on  
11  
12 assistive technology (GREAT) summit. Disability and Rehabilitation: Assistive Technology.  
13  
14 2018;13(5):473-85.  
15

16  
17 12. de Witte L, Steel E, Gupta S, Ramos VD, Roentgen U. Assistive technology provision:  
18  
19 towards an international framework for assuring availability and accessibility of affordable high-  
20  
21 quality assistive technology. Disability and Rehabilitation: Assistive Technology. 2018;13(5):467-  
22  
23 72.  
24  
25

26  
27 13. Smith EM, Gowran RJ, Mannan H, Donnelly B, Alvarez L, Bell D, et al. Enabling  
28  
29 appropriate personnel skill-mix for progressive realization of equitable access to assistive  
30  
31 technology. Disability and Rehabilitation: Assistive Technology. 2018;13(5):445-53.  
32  
33

34  
35 14. MacLachlan M, Banes D, Bell D, Borg J, Donnelly B, Fembek M, et al. Assistive technology  
36  
37 policy: a position paper from the first global research, innovation, and education on assistive  
38  
39 technology (GREAT) summit. Disability and Rehabilitation: Assistive Technology. 2018;13(5):454-  
40  
41 66.  
42  
43

44 15. Sterman JD. Learning from evidence in a complex world. American journal of public health.  
45  
46 2006;96(3):505-14.  
47

48  
49 16. MacLachlan M, Scherer MJ. Systems thinking for assistive technology: a commentary on  
50  
51 the GREAT summit. Disability and Rehabilitation: Assistive Technology. 2018;13(5):492-6.  
52  
53  
54  
55  
56  
57

- 1  
2  
3 17. Holloway C, Austin V, Barbareschi G, Ramos F. Scoping Research Report on Assistive  
4  
5  
6  
7  
8  
9  
10  
11  
12  
13  
14  
15  
16  
17  
18  
19  
20  
21  
22  
23  
24  
25  
26  
27  
28  
29  
30  
31  
32  
33  
34  
35  
36  
37  
38  
39  
40  
41  
42  
43  
44  
45  
46  
47  
48  
49  
50  
51  
52  
53  
54  
55  
56  
57  
58  
59  
60  
2018.
18. United Nations. Malawi 2020 [Available from: <http://mw.one.un.org/country-profile/>].
19. National Policy on Equalisation of Opportunities for Persons with Disabilities (2006).
20. Malawi Government. National Disability Mainstreaming Strategy and Implementation Plan 2018 - 2023. Lilongwe, Malawi; 2018.
21. Loeb M, Eide AH. Living Conditions among people with activity limitations in Malawi. A national representative study. SINTEF Rapport. 2004.
22. Munthali AC. A situation analysis of persons with disabilities in Malawi. 2011.
23. World Health Organization. Global perspectives on assistive technology: proceedings of the GReAT Consultation 2019, World Health Organization, Geneva, Switzerland, 22–23 August 2019. Volume 1. 2019.
24. Ngomwa PMG. Discourse on Intellectual Disability and Improved Access to Assistive Technologies in Malawi. *Frontiers in public health*. 2018;6:377.
25. Coghlan D, Brydon-Miller M. *The SAGE encyclopedia of action research*: Sage; 2014.
26. Boger J, Jackson P, Mulvenna M, Sixsmith J, Sixsmith A, Mihailidis A, et al. Principles for fostering the transdisciplinary development of assistive technologies. *Disability and Rehabilitation: Assistive Technology*. 2017;12(5):480-90.

- 1  
2  
3 27. Albala S, Holloway C, MacLachlan M, Banes D, Bandukda R, Walker J, et al. 'Capturing  
4 and Creating Value in the Assistive Technologies Landscape through a Mission-Oriented  
5 Approach: A New Research and Policy Agenda' AT2030 Working Paper Series (1).  
6  
7  
8  
9  
10 28. De Brún A, O'Donovan R, McAuliffe E. Interventions to develop collectivistic leadership in  
11 healthcare settings: a systematic review. *BMC health services research*. 2019;19(1):72.  
12  
13  
14  
15 29. Michaud-Létourneau I, Gayard M, Mathisen R, Phan LTH, Weissman A, Pelletier DL.  
16 Enhancing governance and strengthening advocacy for policy change of large Collective Impact  
17 initiatives. *Maternal & child nutrition*. 2019;15:e12728.  
18  
19  
20  
21  
22 30. Huss T, MacLachlan M. Equity and Inclusion in Policy Processes (EquIPP): a framework  
23 to support equity & inclusion in the process of policy development, implementation and evaluation:  
24 Global Health Press; 2016.  
25  
26  
27  
28  
29 31. Mason P, Barnes M. Constructing theories of change: Methods and sources. *Evaluation*.  
30 2007;13(2):151-70.  
31  
32  
33  
34 32. Bourdieu P. *The Social Space and the Genesis of Groups Theory and Society*. 1985.  
35  
36  
37 33. Amin M, MacLachlan M, Mannan H, El Tayeb S, El Khatim A, Swartz L, et al. EquiFrame:  
38 A framework for analysis of the inclusion of human rights and vulnerable groups in health policies.  
39 *Health Hum Rights*. 2011;13(2):1-20.  
40  
41  
42  
43  
44 34. Loitz CC, Stearns JA, Fraser SN, Storey K, Spence JC. Network analysis of inter-  
45 organizational relationships and policy use among active living organizations in Alberta, Canada.  
46 *BMC public health*. 2017;17(1):649.  
47  
48  
49  
50  
51  
52  
53  
54  
55  
56  
57  
58  
59  
60

- 1  
2  
3 35. Ryan D, Emond M, Lamontagne M-E. Social network analysis as a metric for the  
4 development of an interdisciplinary, inter-organizational research team. Journal of  
5  
6 interprofessional care. 2014;28(1):28-33.  
7  
8  
9  
10 36. Kania J, Kramer M. Collective impact: FSG; 2011.  
11  
12  
13 37. MacLachlan M, McVeigh J, Cooke M, Ferri D, Holloway C, Austin V, et al. Intersections  
14  
15 Between Systems Thinking and Market Shaping for Assistive Technology: The SMART (Systems-  
16  
17 Market for Assistive and Related Technologies) Thinking Matrix. Int J Environ Res Public Health.  
18  
19 2018;15(12):2627.  
20  
21  
22 38. Gélinas-Bronsard D, Mortenson WB, Ahmed S, Guay C, Auger C. Co-construction of an  
23  
24 Internet-based intervention for older assistive technology users and their family caregivers:  
25  
26 stakeholders' perceptions. Disability and Rehabilitation: Assistive Technology. 2019;14(6):602-11.  
27  
28  
29  
30  
31  
32  
33  
34  
35  
36  
37  
38  
39  
40  
41  
42  
43  
44  
45  
46  
47  
48  
49  
50  
51  
52  
53  
54  
55  
56  
57  
58  
59  
60

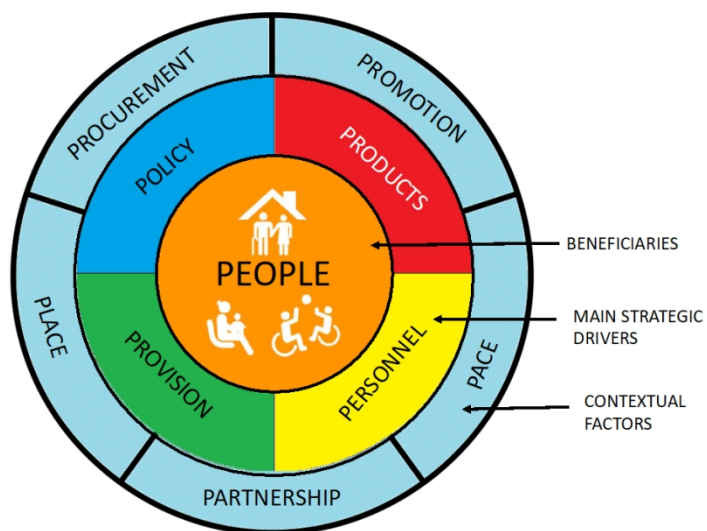

The 10 Ps of Systems Thinking for Assistive Technology Adapted from MacLachlan & Scherer, 2018, with permission)

235x132mm (144 x 144 DPI)

1  
2  
3  
4  
5  
6  
7  
8  
9  
10  
11  
12  
13  
14  
15  
16  
17  
18  
19  
20  
21  
22  
23  
24  
25  
26  
27  
28  
29  
30  
31  
32  
33  
34  
35  
36  
37  
38  
39  
40  
41  
42  
43  
44  
45  
46  
47  
48  
49  
50  
51  
52  
53  
54  
55  
56  
57  
58  
59  
60

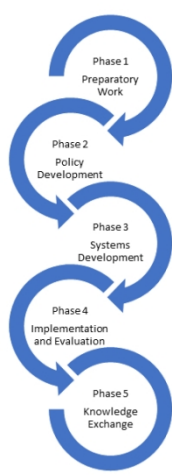

APPLICABLE research phases  
338x190mm (96 x 96 DPI)

1  
2  
3  
4  
5  
6  
7  
8  
9  
10  
11  
12  
13  
14  
15  
16  
17  
18  
19  
20  
21  
22  
23  
24  
25  
26  
27  
28  
29  
30  
31  
32  
33  
34  
35  
36  
37  
38  
39  
40  
41  
42  
43  
44  
45  
46  
47  
48  
49  
50  
51  
52  
53  
54  
55  
56  
57  
58  
59  
60

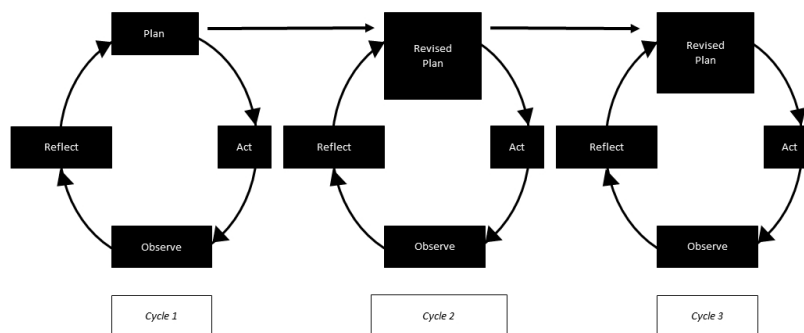

Action Research Process

338x190mm (96 x 96 DPI)



# BMJ Open

## Implementation of the Assistive Product List (APL) in Malawi through development of appropriate policy and systems: An Action Research Protocol

|                                 |                                                                                                                                                                                                                                                                                                                                                                                                                      |
|---------------------------------|----------------------------------------------------------------------------------------------------------------------------------------------------------------------------------------------------------------------------------------------------------------------------------------------------------------------------------------------------------------------------------------------------------------------|
| Journal:                        | <i>BMJ Open</i>                                                                                                                                                                                                                                                                                                                                                                                                      |
| Manuscript ID                   | bmjopen-2020-040281.R1                                                                                                                                                                                                                                                                                                                                                                                               |
| Article Type:                   | Protocol                                                                                                                                                                                                                                                                                                                                                                                                             |
| Date Submitted by the Author:   | 13-Aug-2020                                                                                                                                                                                                                                                                                                                                                                                                          |
| Complete List of Authors:       | Ebuenyi, Ikenna; National University of Ireland Maynooth, Psychology Smith, Emma; National University of Ireland Maynooth, Psychology Kafumba, Juba; University of Malawi, Centre for Social Research Jamali, Monica; University of Malawi, Centre for Social Research Munthali, Alister; University of Malawi, Centre for Social Research MacLachlan, Malcolm ; National University of Ireland Maynooth, Psychology |
| <b>Primary Subject Heading</b>: | Public health                                                                                                                                                                                                                                                                                                                                                                                                        |
| Secondary Subject Heading:      | Global health, Health policy, Health services research, Rehabilitation medicine                                                                                                                                                                                                                                                                                                                                      |
| Keywords:                       | REHABILITATION MEDICINE, PUBLIC HEALTH, SOCIAL MEDICINE, Health policy < HEALTH SERVICES ADMINISTRATION & MANAGEMENT                                                                                                                                                                                                                                                                                                 |
|                                 |                                                                                                                                                                                                                                                                                                                                                                                                                      |

SCHOLARONE™  
Manuscripts



I, the Submitting Author has the right to grant and does grant on behalf of all authors of the Work (as defined in the below author licence), an exclusive licence and/or a non-exclusive licence for contributions from authors who are: i) UK Crown employees; ii) where BMJ has agreed a CC-BY licence shall apply, and/or iii) in accordance with the terms applicable for US Federal Government officers or employees acting as part of their official duties; on a worldwide, perpetual, irrevocable, royalty-free basis to BMJ Publishing Group Ltd ("BMJ") its licensees and where the relevant Journal is co-owned by BMJ to the co-owners of the Journal, to publish the Work in this journal and any other BMJ products and to exploit all rights, as set out in our [licence](#).

The Submitting Author accepts and understands that any supply made under these terms is made by BMJ to the Submitting Author unless you are acting as an employee on behalf of your employer or a postgraduate student of an affiliated institution which is paying any applicable article publishing charge ("APC") for Open Access articles. Where the Submitting Author wishes to make the Work available on an Open Access basis (and intends to pay the relevant APC), the terms of reuse of such Open Access shall be governed by a Creative Commons licence – details of these licences and which [Creative Commons](#) licence will apply to this Work are set out in our licence referred to above.

Other than as permitted in any relevant BMJ Author's Self Archiving Policies, I confirm this Work has not been accepted for publication elsewhere, is not being considered for publication elsewhere and does not duplicate material already published. I confirm all authors consent to publication of this Work and authorise the granting of this licence.

1  
2  
3 1 Implementation of the Assistive Product List (APL) in Malawi through development of  
4  
5  
6 2 appropriate policy and systems: An Action Research Protocol  
7

8 3 Ikenna D Ebuenyi,<sup>1</sup> Emma M Smith,<sup>1</sup> Juba Kafumba,<sup>2</sup> Monica Z Jamali,<sup>2</sup> Alister Munthali,<sup>2</sup>  
9  
10 4 Malcolm MacLachlan<sup>1,3</sup>  
11  
12 5

13 6 <sup>1</sup> Assisting Living & Learning (ALL) Institute, Department of Psychology, Maynooth University,  
14  
15 7 Maynooth, Ireland  
16  
17 8

18 9 <sup>2</sup>Centre for Social Research, University of Malawi, Zomba, Malawi  
19  
20 10

21  
22 11 <sup>3</sup>Olomouc University Social Health Institute (OUSHI), Palacký University, Olomouc, Czech  
23  
24 12 Republic.  
25  
26 13

27 14  
28  
29 15  
30  
31  
32 16 Correspondence to: Dr. Ikenna D Ebuenyi; [Ikenna.ebuenyi@mu.ie](mailto:Ikenna.ebuenyi@mu.ie)  
33  
34  
35  
36  
37  
38  
39  
40  
41  
42  
43  
44  
45  
46  
47  
48  
49  
50  
51  
52  
53  
54  
55  
56  
57  
58  
59  
60

1  
2  
3  
4  
5  
6  
7  
8  
9  
10  
11  
12  
13  
14  
15  
16  
17  
18  
19  
20  
21  
22  
23  
24  
25  
26  
27  
28  
29  
30  
31  
32  
33  
34  
35  
36  
37  
38  
39  
40  
41  
42  
43  
44  
45  
46  
47  
48  
49  
50  
51  
52  
53  
54  
55  
56  
57  
58  
59  
60

1  
2  
3  
4  
5  
6  
7  
8  
9  
10  
11  
12  
13  
14  
15  
16  
17  
18  
19  
20  
21  
22  
23  
24  
25  
26  
27  
28  
29  
30  
31  
32  
33  
34  
35  
36  
37  
38  
39  
40  
41  
42  
43  
44  
45  
46  
47  
48  
49  
50  
51  
52  
53  
54  
55  
56  
57  
58  
59  
60

For peer review only

Abstract

Introduction

Assistive Technology (AT) is important for the achievement of the Sustainable Development Goals (SDGs) for persons with disabilities (PWD). Increasingly, studies suggest a significant gap between the need for and demand for and provisions of AT for PWD in low- and middle-income settings. Evidence from high income countries highlights the importance of robust AT policies to the achievement of the recommendations of the World Health Assembly on AT. In Malawi, there

1 is no standalone AT policy. The objectives of the priority Assistive Product list Implementation  
2 Creating Enablement of inclusive SDGs (APPLICABLE) project, are to propose and facilitate the  
3 development of a framework for creating effective national Assistive Technology (AT) policy and  
4 specify a system capable of implementing such policies in low-income countries such as Malawi.

#### 5 **Method and analysis**

6 We propose an action research process with stakeholders in AT in Malawi. APPLICABLE will  
7 adopt an action research paradigm, through developing a shared research agenda with  
8 stakeholders and including users of AT. This involves the formation of an Action Research Group  
9 (ARG) that will specify the priorities for practice - and policy-based evidence, in order to facilitate  
10 the development of contextually realistic and achievable policy aspirations on AT in Malawi and  
11 provide system strengthening recommendations that will ensure that the policy is implementable  
12 for their realization. We will undertake an evaluation of this policy by measuring supply and support  
13 for specific AT prior to, and following the implementation of the policy recommendations.

#### 14 **Ethics and Dissemination**

15 The Maynooth University Research Ethics Committee approved the study protocol (SRESC-2019-  
16 2378566) while ethical approval is being awaited from the University of Malawi Research Ethics  
17 Committee. Findings from the study will be disseminated by publication in peer-reviewed journals,  
18 presentations to stakeholders in Malawi, Ireland, and international audiences at international  
19 conferences.

20  
21 **Keywords:** Action Research, Assistive Technology Policy, Assistive Product List, Collective  
22 Leadership, Malawi

1  
2  
3 1  
4  
56 2 **Strength and Limitations of this Study**

8 3 ➤ This study will be the first in Africa to explore the development of a national Assistive  
9  
10 4 Technology policy and Assistive Product list in response to the recommendations of the  
11  
12 5 WHO.

15 6 ➤ The framework developed from this study, will lead to strengthening of the Assistive  
16  
17 7 Technology ecosystem in Malawi and may be relevant in other countries with similar  
18  
19 8 interest.

22 9 ➤ Using an emergent and action learning approach strengthens both the methods and  
23  
24 10 reflexivity of the research process and ensures active participation of all stakeholders.

27 11 ➤ The use of a flexible research methodology may lead to researcher bias and deviation from  
28  
29 12 the initial objectives may occur on account of the reliance on the contribution from multiple  
30  
31 13 stakeholders.

34 14 ➤ The proposed principle of collective leadership may be a hard sell to the stakeholders in  
35  
36 15 government who are used to the traditional single ministry lead in policy development.  
37  
38 16  
39  
40 17

## 1 Introduction

2 Persons with disabilities (PWD) often experience overt and covert barriers to participation in  
3 society and exercise of their rights.<sup>1</sup> These experiences of deprivation have dire implications  
4 for PWD, depending on their location and type of impairment. This realization has led to  
5 various efforts at both national and international level to ensure the reduction and elimination  
6 of the deprivation experience by PWD.<sup>1, 2</sup> The United Nations Convention on the Rights of  
7 Persons with Disabilities (UN CRPD) and the Sustainable Development Goals (SDGs)  
8 emphasize the importance of inclusion for PWD.<sup>3, 4</sup> The SDGs highlight the importance of  
9 social inclusion through the slogan- 'leave no one behind'.

10  
11 Assistive Technology (AT) is pivotal to achieving this mandate of inclusion of PWD.<sup>4, 5</sup> AT is a  
12 'subset of health technology systems and refers to "the development and application of  
13 organised knowledge, skills, procedures, and policies relevant to the provision, use, and  
14 assessment of assistive products".<sup>6</sup> while an assistive product is "any product (including  
15 devices, equipment, instruments, and software), either specially designed and produced or  
16 generally available, whose primary purpose is to maintain or improve an individual's  
17 functioning and independence and thereby promote their wellbeing".<sup>6</sup> Common examples of  
18 assistive products in different impairment domains include wheelchairs, white canes, hearing  
19 aids, communication boards and calendar pill boxes. In 2014, the WHO established the Global  
20 Cooperation on Assistive Technology (GATE) in order to address the global need for AT.<sup>7</sup>  
21 One of the first tasks for GATE was to establish a Priority Assistive Product List (APL)<sup>8</sup> which  
22 called for countries to develop their own context specific national APL, similar to the WHO

1  
2  
3 1 Essential medicines list.<sup>9</sup> The APL is not restrictive but a guide provided by GATE for countries  
4  
5  
6 2 to use in identifying national AT needs and priorities.<sup>8</sup>  
7  
8 3  
9  
10 4 In a bid to improve access to AT , GATE recommended five priority (5Ps) themes, namely  
11  
12  
13 5 people, policy, products, provision and personnel.<sup>8</sup> That schema put *people*, or users of AT,  
14  
15 6 at the centre and policy, products, provision and personnel, as strategic points of action to  
16  
17 7 improve access to AT around the world. In a series of position papers from the Global  
18  
19 8 Research, Innovation and Education on Assistive Technology (GREAT) summit organized by  
20  
21 9 GATE, people were identified as important drivers in AT access;<sup>10</sup> context sensitive products  
22  
23 10 were considered relevant for AT accessibility;<sup>11</sup> the development of an international standard  
24  
25 11 for provision of AT was seen as important for service user safety,<sup>12</sup> and the certification of  
26  
27 12 competency for AT personnel as important for staff training,<sup>13</sup> along with an inclusive  
28  
29 13 development of national AT policies, all to improve access to AT.<sup>14</sup> Along with these papers,  
30  
31 14 an additional 5 Ps – specifically referring to the context of AT services were also identified as  
32  
33 15 emergent from the discussions at the Summit (see Figure 1) The additional 5Ps include  
34  
35 16 Procurement, Place, Pace, Promotion and Partnership; and are key situational factors for  
36  
37 17 systems in diverse context. These situate the previous 5 Ps in national and local contexts that  
38  
39 18 determine access to AT. For instance, to ensure that *Procurement* or purchasing AT products  
40  
41 19 occur at national level in line with national and contextual factors that take into account *Place*  
42  
43 20 or differences in local settings; at a *Pace* that is feasible and can be absorbed within the  
44  
45 21 systems' capacity, using context sensitive methods to *promote* positive images of AT users  
46  
47 22 and with cross cutting *partnerships*.<sup>15</sup>  
48  
49  
50  
51  
52  
53  
54  
55  
56  
57  
58  
59  
60



1  
2  
3 1  
4  
5  
6 2 **Figure 1: The 10 Ps of Systems Thinking for Assistive Technology Adapted from MacLachlan**  
7  
8 3 **& Scherer, 2018, with permission)**  
9

10 4  
11  
12  
13 5 Sterman suggests that it is not a lack of resources, technical knowledge or commitment that  
14  
15 6 prevents us from making improvements in public health services but rather, “What thwarts us  
16  
17 7 is our lack of meaningful systems thinking capability”.<sup>16</sup> Specifically in relation to AT,  
18  
19 8 MacLachlan and Scherer argue that “a systems thinking approach allows for a meaningful  
20  
21 9 linking of components and processes, a more realistic understanding of why and where  
22  
23 10 initiatives might fail or succeed, and a more satisfying way of placing the user of assistive  
24  
25 11 technology at the centre of ideas, activities and outcomes.”<sup>15</sup>  
26  
27  
28  
29  
30  
31

32 13 **The Malawi Context**  
33

34 14 Increasingly, studies suggest low demand and provision of Assistive Technology (AT) for  
35  
36 15 PWD in low- and middle-income settings.<sup>17</sup> Malawi is a Southern African country with a  
37  
38 16 population of about 18 million. The economy is largely agrarian, and the government depends  
39  
40 17 on foreign aid. Malawi ranks 172 out 189 countries based on the United Nations Human  
41  
42 18 Development Index.<sup>18</sup> In Malawi, there are several policies and strategies at the national level  
43  
44 19 which are relevant to the experiences of PWD, each which should have relevance to AT.  
45  
46 20 Notably, the National Policy on the Equalization of Opportunities for PWD <sup>19</sup> and National  
47  
48 21 Disability Mainstreaming Strategy and Implementation Plan;<sup>20</sup> yet there are no clear direction  
49  
50 22 guidelines on how AT should be provided in the country <sup>20</sup>. It is pertinent to state that the  
51  
52  
53  
54  
55  
56  
57  
58  
59  
60

1  
2  
3 1 National Policy on the Equalization of Opportunities for Persons with Disabilities was adopted  
4  
5  
6 2 in 2006; and processes are under way to develop a successor plan on account of its expiration.  
7  
8 3 In Malawi, there is a huge gap between the need and access to services PWD.<sup>21</sup> Although  
9  
10 4 about 69% of PWD need assistive devices in Malawi, only 5% have access to them.<sup>22</sup>  
11  
12  
13 5 Evidence from high income countries highlights the importance of robust AT policies for the  
14  
15 6 achievement of the recommendations of the WHA on AT.<sup>23</sup> In Malawi, there is no standalone  
16  
17 7 AT policy.<sup>24</sup>  
18  
19  
20  
21  
22

23 9 The objectives of the Assistive Product List Implementation Creating Enablement of inclusive  
24  
25 10 SDGs (APPLICABLE) project are (i) to propose and facilitate the development of *a framework*  
26  
27 11 for creating effective national Assistive Technology (AT) policy and (ii) *specify a system*  
28  
29 12 capable of implementing that policy in Malawi.  
30  
31  
32

### 33 13 [Methods and Analysis](#)

#### 34 14 [Approach](#)

35  
36 15 The study will adopt an action research approach<sup>25</sup> and shared research agenda in  
37  
38 16 collaboration with AT stakeholders in Malawi to achieve the study objectives. Hence, this  
39  
40 17 research protocol is based on a proposed research plan by the research teams at Maynooth  
41  
42 18 University and the University of Malawi and the discussions held during the project launch and  
43  
44 19 formation of an Action Research Group (ARG) in Malawi.  
45  
46  
47 20 The relevance of action research for solving persistent problems has been extensively reported.<sup>25</sup>  
48  
49 21 Boger et al recommend collaborative transdisciplinary approach for solving persistent problems  
50  
51 22 in AT.<sup>26</sup> In adopting this method, we aim to ensure that the process of AT policy development is  
52  
53 23 participatory, collaborative and undertaken through a transparent and reflexive process with  
54  
55  
56  
57  
58  
59  
60

1 relevant stakeholders in Malawi. Equally essential is the relevance of the action research paradigm  
2 to the systems-thinking and mission-oriented approach which are central to the objectives of  
3 APPLICABLE. A systems thinking approach will ensure APPLICABLE focuses on the range of  
4 Ps (described above) to bridge the AT systems Gap in Malawi.<sup>15, 27</sup> 'Collective leadership'<sup>28, 29</sup> will  
5 be a guiding principle for the research, whereby all the participating ministries and other major  
6 stakeholders, take active leadership in the project in order to engender collective impact which is  
7 supported by research. Collective leadership refers to a group of people working together to  
8 achieve a set goal.<sup>28, 29</sup> In this case, we envision co-construction of leadership and shared  
9 responsibility by different stakeholders involved in AT in Malawi.<sup>30</sup> According to De Bruin et al.,  
10 collective leadership was associated with improved communication and role clarity, greater  
11 willingness to adopt leadership roles and 'give and take' by leaders, who became more willing to  
12 share leadership responsibilities.<sup>28</sup> Also, Michaud-Létourneau suggest that the approach is useful  
13 for changing policy where many stakeholders exist.<sup>29</sup> We would strive to minimize power  
14 imbalances and the pitfalls of collective leadership by continuous learning and knowledge sharing  
15 to co-construct what works for everyone through reflective dialogues.<sup>31</sup>

16  
17  
18 The specific research methods described below are tactical and will be decided with the ARG in  
19 an iterative process through a series of five phases, each comprised of Action Research Cycles.  
20 The content for each of those action research cycles will be decided with key stakeholders in AT  
21 in Malawi through the formation of an Action Research Group (ARG).

22

1  
2  
3  
4 1  
5 2 **Formative Research**  
6  
7 3 Prior to the project launch, a series of steps were undertaken as part of the formative research  
8  
9 4 process. Initial meetings were held with the Ministries of Gender, Children, Disability and Social  
10  
11 5 Welfare (MoGCD&SW), Health, Education, and Labour, Disabled People's Organisations, other  
12  
13 6 civil society, service providers, donors, industry and UN agencies. Presentation and discussions  
14  
15 7 on establishing a AT policy and implementation systems in Malawi were discussed and the  
16  
17 8 stakeholders expressed interest in the 36 months (January 2019-December 2021) project.

19 9 The project launch was held on the 6<sup>th</sup> of December 2019 with over 40 stakeholders drawn from  
20  
21 10 five broad stakeholder groups namely:

- 26 11 1. Government Stakeholders (e.g. Ministries of Health, Education, Gender and Persons with  
27  
28 12 Disabilities and the Elderly)
- 31 13 2. Non-governmental non-profit stakeholders (e.g. Federation of Disability Organization in  
32  
33 14 Malawi (FEDOMA), and Beit Cure International Hospital (BT) Malawi Council for the  
34  
35 15 handicapped (MACOHA))
- 38 16 3. Non-governmental for-profit stakeholders (Pharmacist, Physiotherapist)
- 40  
41 17 4. Academic Institutions
- 43 18 5. United Nation agencies (e.g. UNICEF, WHO, UNDP)

45 19 It is pertinent to state that persons with disabilities and users AT products are not restricted to only  
46  
47 20 group four but are also in the other groups. They are involved in all the research processes and  
48  
49 21 as part of the ARG.

52 22 The formative research stage describes activities undertaken prior to the project launch. We would  
53  
54 23 now describe the proposed research phases developed following the project launch.

1  
2  
3  
4 1  
5 2 **Research Phases**  
6  
7 3 The study will be conducted in five phases. The details of each phase will be collaboratively  
8  
9 4 decided during the action research project, but these phases will guide the work throughout the  
10  
11 5 project.

12  
13  
14 6 The five phases of the research are Preparatory Work, Policy Development, Systems  
15  
16 7 Development, Implementation and Evaluation, and Knowledge Exchange (Figure 2).  
17  
18

19 8

20 9

21  
22  
23  
24 10 **Figure 2: APPLICABLE research phases**  
25

26 11  
27  
28  
29 12 *Phase 1- Preparatory Work.* This stage starts with the project launch and formation of the Action  
30  
31 13 Research Group (ARG). Following the project launch, 15 persons were invited from the  
32  
33 14 stakeholders present to join the ARG. Members of the ARG have been purposively selected to  
34  
35 15 work on the policy development and implementation.

36  
37  
38 16 The ARG adopted the proposed process and agreed that:

- 39  
40  
41 17
  - A realistic AT policy and delivery system is needed in Malawi.
- 42  
43 18
  - That ownership of the policy will be further discussed and that initially it will be co-led by
- 44  
45 19 members of the Action Research Group.
- 46  
47  
48 20
  - Data will be stored at the Centre for Social Research, Malawi.

49  
50 21 The launch was organized in collaboration with Clinton Health access Initiative (CHAI) who  
51  
52 22 previously conducted a baseline survey on AT in Malawi. They presented the results on their  
53  
54 23 survey after which APPLICABLE was introduced by the Principal investigators from Malawi and

1  
2  
3 1 Ireland. This was followed by reactions from stakeholders and selection of the ARG from the  
4  
5  
6 2 stakeholders' present. The discussions with the ARG, informed the proposed research phases  
7  
8 3 (Table 1):  
9

10 4  
11  
12  
13 5 The nature of action research is that the methodology of the group is decided upon by the group  
14  
15 6 and is likely to change and evolve as they address different issues.<sup>25</sup> Following an action research  
16  
17 7 approach, the group will thus **plan** what to do – take clear and specific **action** – **observe** and collect  
18  
19 8 data on the consequences of this action – and as a group **reflect** on the implications for designing  
20  
21 9 policy to and systems to promote access to AT. In order to conduct preparatory work, we will  
22  
23 10 conduct a literature review of academic and grey literature in assistive technology in Malawi and  
24  
25 11 review data available from existing datasets. In addition, we would conduct interviews with users  
26  
27 12 and providers of AT guided by the data from a Country Capacity assessment by the Clinton Health  
28  
29 13 Access Initiative (CHAI) in partnership with the Assistive Technology 2030 project. The research  
30  
31 14 team will also assess inclusivity of the process of policy development and implementation in  
32  
33 15 existing policies using the EquIPP (Equity and Inclusion in Policy Processes) tool.<sup>32</sup> The EquIPP  
34  
35 16 <sup>32</sup> tool was developed with the United Nations Partnership on the Rights of Persons with  
36  
37 17 Disabilities (UNPRPD) and measures, evaluates and makes recommendations for improvement  
38  
39 18 in regard to inclusive policy development and evaluation. It consists of 17 Key Actions that provide  
40  
41 19 guidance on how to ensure an equitable and inclusive policy development process.  
42  
43  
44  
45  
46  
47  
48  
49  
50

51 21 Phase 2 – Policy Development: Phase 2 will focus on the development of a draft policy, guided by  
52  
53 22 the EquIPP framework for inclusive policy development. A theory of change<sup>33</sup> will be undertaken  
54  
55  
56  
57  
58  
59  
60

1  
2  
3 1 to guide the APL development while Force Field Analysis<sup>34</sup> to explore the political economy and  
4  
5  
6 2 power relationships on AT in Malawi would be conducted. Force Field Analysis<sup>34</sup> is a qualitative  
7  
8 3 research method that conceptualises how forces for and against change are poised and thus  
9  
10 4 helps in the systematic analysis of possible change processes. Bourdesian Analysis<sup>35</sup> applies  
11  
12 5 the idea of the social space being composed of fields of identify and power relations which are  
13  
14  
15 6 likely to influence change process.  
16  
17  
18 7

19  
20 8 The ARG will design a Draft AT Policy, supported by the research team; drawing on the literature  
21  
22 9 reviewed above and taking into account the Malawian context. It is anticipated that the resultant  
23  
24  
25 10 draft may also be assessed for the degree to which it promotes inclusivity (e.g. service users,  
26  
27 11 gender, rurality, poverty, etc.) using the EquiFrame tool.<sup>36</sup> EquiFrame<sup>36</sup> which is a tool for  
28  
29  
30 12 Evaluating and Promoting the Inclusion of Vulnerable Groups and Core Concepts of Human  
31  
32 13 Rights in Health Policy Documents. It consists of 21 Core Concepts that covers issues relating to  
33  
34  
35 14 universal, equitable and accessible healthcare.  
36  
37  
38  
39  
40  
41  
42  
43

44 17 *Phase 3-System Development:* This phase involves the development of system strengthening  
45  
46 18 recommendations based on knowledge and information generated from the policy development  
47  
48 19 process. The ARG will also address what implications there are at the systems level for delivering  
49  
50 20 on the Draft AT Policy; and to recommend how these can be addressed in the Malawian context.  
51  
52 21 Data would be used to demonstrate the link between the different government ministries and  
53  
54 22 stakeholders to the SDG matrix; and thus highlight the relevance of AT to achievement of the  
55  
56  
57  
58  
59  
60

1  
2  
3 1 SDGs.<sup>4</sup> The SDG Matrix will be used to demonstrate the concept that that assistive products have  
4  
5  
6 2 a direct impact on the achievement of the SGDs. Tebbutt and colleagues suggest that assistive  
7  
8 3 products can be both mediators and a moderators of SDG achievement <sup>5</sup> A network analysis<sup>37, 38</sup>  
9  
10 4 would be undertaken to explore the strength and nature of relationship between stakeholders on  
11  
12  
13 5 AT in Malawi. The collective leadership approach will be very useful in this phase to ensure  
14  
15 6 collective impact and system development.<sup>39</sup>  
16  
17  
18 7  
19

20 8 *Phase 4- Implementation and Evaluation.* This phase marks the beginning of the implementation  
21  
22 9 and evaluation of the AT policy developed. Over an agreed period, the participating government  
23  
24  
25 10 ministries and stakeholders will identify a suitable service provider to trial the implementation of  
26  
27  
28 11 the Draft AT Policy, with the support of the identified ministry and the research team. While the  
29  
30 12 ARG will be in a continuing process of evaluation and feedback themselves, stakeholders who  
31  
32 13 attended the project launch will be asked to attend a project review meeting where the ARG and  
33  
34  
35 14 research team will present findings. The ARG will also identify AT service users to present their  
36  
37 15 experiences during this workshop. The SMART (Systems-Market for Assistive and Related  
38  
39 16 Technologies) Thinking Matrix framework will be used during the implementation and  
40  
41  
42 17 evaluation.<sup>40</sup> The SMART Thinking Matrix is a framework for conceptualizing intersections  
43  
44 18 between systems levels and market shaping for assistive technology and was derived form a  
45  
46 19 systematic review of the interface between these two literatures.<sup>40</sup>  
47  
48  
49 20  
50

51 21 *Phase 5-Knowledge Exchange.* This phase entails ensuring knowledge exchange impact of the  
52  
53  
54 22 research process. The ARG and the Research Team will use results from previous phases to  
55  
56  
57  
58  
59  
60



1  
2  
3 1 identify key features that might be relevant for a generic National Framework for AT, that will be  
4  
5  
6 2 generalised to other countries and contexts. In keeping with Action Research methodology, expert  
7  
8 3 advisers (all of whom we have worked with before) who will be available to provide support to the  
9  
10 4 ARG shall provide feedback on the research process. This support could be provided either  
11  
12  
13 5 virtually or through attendance at project meeting in Malawi; as determined by the needs of the  
14  
15 6 ARG and the available budget of the project.  
16  
17  
18 7  
19

## 20 8 Action Research Methodology

21  
22 9 Throughout the five phases described above, we will use an Action Research Methodology<sup>25</sup>  
23  
24  
25 10 informed by the needs of the ARG. This will take the form of Action Research Cycles each  
26  
27 11 consisting of four components: plan, act, observe, and reflect (Figure 3), to answer the research  
28  
29 12 questions which are posed by the ARG, and contribute to the development of each phase.  
30  
31  
32 13  
33  
34 14  
35  
36 15  
37  
38

## 39 16 **Figure 3. Action Research Process**

40  
41 17  
42  
43  
44 18 Throughout these cycles, we will use multiple study methods to address the questions posed by  
45  
46 19 the ARG (Table 1). For each research methodology, specific study procedures (Table 1) to  
47  
48 20 produce requested content for use in the action research cycle will be decided with the ARG.  
49  
50  
51 21  
52  
53 22  
54  
55  
56  
57  
58  
59  
60

1

2 **Table 1: Planned and anticipated research methodology**

| Research Phase                                                                                | Methodology                                                                                                                                                                                                                                                                                                                                                                                                                                                                                                                 |
|-----------------------------------------------------------------------------------------------|-----------------------------------------------------------------------------------------------------------------------------------------------------------------------------------------------------------------------------------------------------------------------------------------------------------------------------------------------------------------------------------------------------------------------------------------------------------------------------------------------------------------------------|
| <b>Phase 1 - Preparatory Work: Understanding the Assistive technology context in Malawi</b>   | <ol style="list-style-type: none"> <li>1. <b>Literature Review:</b> Assistive technology service delivery and policy review using academic and grey literature</li> <li>2. <b>Data Review:</b> Secondary data analysis of existing datasets (i.e. Census, SINTEF dataset) and interviews</li> <li>3. <b>Country Capacity Assessment:</b> In collaboration with AT2030 and the Clinton Health Access Initiative</li> <li>4. <b>EquiPP:</b> Review of existing policies for inclusive policy development processes</li> </ol> |
| <b>Phase 2 – Policy Development: Identifying Key Change Agents and Contexts</b>               | <ol style="list-style-type: none"> <li>5. <b>EquiPP:</b> Inclusive policy development process</li> <li>6. <b>Theory of Change:</b> Development of theory of change for APL development</li> <li>7. <b>Field Analysis:</b> Force Field Analysis and Bourdesian Analysis to understand political economy and power relationships</li> </ol>                                                                                                                                                                                   |
| <b>Phase 3 - Systems Development: Engagement in Collective Leadership to Achieve the SDGs</b> | <ol style="list-style-type: none"> <li>8. <b>SDG Matrix:</b> Linking ministries to SDG achievement and role of AT</li> <li>9. <b>Network Analysis:</b> Strength and nature of existing networks between key stakeholders in AT in Malawi</li> </ol>                                                                                                                                                                                                                                                                         |
| <b>Phase 4 – Implementation and Evaluation: Delivering a Policy</b>                           | <ol style="list-style-type: none"> <li>10. <b>Systems Coherence Development:</b> Addressing gaps in existing network to strengthen coherence for GATE 10Ps</li> <li>11. <b>Market Shaping Analysis:</b> Smart Thinking Matrix</li> </ol>                                                                                                                                                                                                                                                                                    |

|                                                                                      |                                                                                                                                                                                                                                           |
|--------------------------------------------------------------------------------------|-------------------------------------------------------------------------------------------------------------------------------------------------------------------------------------------------------------------------------------------|
| <p><b>or Strategy in Context</b></p>                                                 | <p>12. <b>Piloting:</b> Implementation of strategy in key areas with review of process and outcomes</p>                                                                                                                                   |
| <p><b>Phase 5 – Knowledge Exchange: Applying Knowledge to the Global Context</b></p> | <p>13. <b>Policy Framework:</b> Identification of key concepts for broader applicability to other contexts</p> <p>14. <b>Systems Implementation Framework:</b> Specification of implementation system to be applied to other contexts</p> |

## Data collection and Management

All data including the transcripts will be stored according to the provisions of the Centre for Social Research, University of Malawi Research Practice and Procedures. Hence, all primary data will be held permanently following its acquisition and used in publication for the purpose of this study and recommendations of the ARG. All data will be anonymized, and informed consent will be obtained from all study participants and stakeholders at every stage of the research process. Study participants entail all who are recruited or invited to participate in the study and may include stakeholders who are users or providers of AT. A data dictionary will be kept and maintained for both quantitative and qualitative data to ensure that all authorized individuals are able to reuse the data. Secondary data would be obtained from National the Statistics Office and National Survey on living conditions of persons with disabilities (SINTEF).

## Data Analysis

The data analysis method adopted will be dependent on the data type from the different phases of the study. For instance, analytic review methods would be used for literature and document review in phases 1 and 5.<sup>41</sup> For qualitative data(From phases 1-5), content and framework analysis

1 will be used while for quantitative data (Phase 1, 2 and 3), descriptive statistics and regression  
2 analysis will be undertaken to understand factors relevant for improved access to AT and creation  
3 of a nation AT policy in Malawi.<sup>41</sup>

4 The EquIPP and EquiFrame tools<sup>32, 36</sup> would also be used to analyze existing policy on disability  
5 and the proposed AT policy. Quantitative data will be analysed using the Statistical Package for  
6 the Social Sciences (SPSS) version 23 while qualitative data will be analysed via *Atlas. ti version*  
7 *7.5.18*. All data will be anonymized and not contain any personal identifiers.

8

#### 9 Patient and Public Involvement

10 No patient involved

11

#### 12 Ethics and Dissemination

13 Ethical approval (SRESC-2019- 2378566) was obtained from the Maynooth University Social  
14 Research Ethics Committee while final ethical approval is being awaited from the University of  
15 Malawi Research Ethics Committee (UNIMAREC).

16 The results from the study will be disseminated through presentations at conferences both  
17 within Malawi and abroad with stakeholders in and at international conferences; and publishing  
18 in peer-reviewed journals and on the websites of Maynooth and University of Malawi

19

#### 20 Discussion

21 The aim of APPLICABLE is to develop a national AT policy for Malawi and to contribute to the  
22 development of a framework in the process that may be relevant in other countries. Also, it is

1 anticipated that the process will evolve a framework that will lead to strengthening of the AT  
2 ecosystem through collaborative action and partnership with all stakeholders.

3  
4  
5  
6  
7  
8  
9  
10  
11 4 These objectives informed the adoption of the Action Research approach that sets out on a  
12  
13 5 research path without specific research agenda but entrusts the direction of the research to  
14  
15 6 local and informed actors on AT in Malawi, to ensure a shared research agenda and  
16  
17 7 development of context useful knowledge. This approach is in line with the ethos of the Mission  
18  
19 8 Oriented Approach for AT proposed by Albala and colleagues.<sup>27</sup> It also avoids the common  
20  
21 9 pitfall of most implementation research, where research is done for rather than with local  
22  
23 10 stakeholders. Also, the action research approach ensures the development of context specific  
24  
25 11 approaches for the development of APL for Malawi. Low income settings like Malawi have  
26  
27 12 particular AT challenges that must take into consideration the local realities rather than  
28  
29 13 adopting recommendations from high income settings with different socio-economic milieu.  
30  
31 14 According to Gélinas-Bronsard and colleagues, accessing AT is a matter of resources.<sup>30</sup> While  
32  
33 15 it is obvious that factors outside finance play a role in the access and utilization of AT, its  
34  
35 16 pivotal role in LMICS, where health care insurance and social welfare packages are absent,  
36  
37 17 is a key issue that the action research approach must explicitly address.

38  
39  
40  
41  
42  
43  
44 18  
45  
46 19 The Collective Leadership approach will help to ensure all stakeholders engaged in the action  
47  
48 20 research approach feel a sense of ownership and promote buy-in at all levels in the  
49  
50 21 implementation phase. Historically, in Malawi and in other countries, a single ministry  
51  
52 22 maintains responsibility for the development and implementation of policy – considered the  
53  
54  
55  
56  
57  
58  
59  
60

1  
2  
3 1 policy holder. In this case, either the ministry of Health or Gender and disability or Education  
4  
5  
6 2 may desire to claim ownership on account of perceived 'proximity' of AT to their ministry.  
7  
8 3 However, AT is more than just a health issue, or disability problem as shown by data from our  
9  
10 4 SDG matrix. It cuts across various sectors such as education, sports and therefore require  
11  
12  
13 5 collaborative approach. As shown by Tebbut and colleagues, AT is relevant for the  
14  
15 6 achievement of each of the 17 SDGs;<sup>5</sup> hence requires cross cutting collaboration between all  
16  
17  
18 7 players in Malawi. Interestingly, the collective leadership approach is noted to be useful for  
19  
20 8 changing policy where many stakeholders exist and led to relevant policy changes in infant  
21  
22  
23 9 and young child feeding policies in seven countries in Southeast Asia.<sup>29</sup> Similarly, a systematic  
24  
25 10 review by De Brun and colleagues showed that collectivistic leadership was associated  
26  
27  
28 11 positive outcomes in health care settings in Europe and North America.<sup>28</sup> It is pertinent to note  
29  
30 12 that in order to solve social problems and achieve collective impact, commitment of all relevant  
31  
32  
33 13 actors is crucial<sup>39</sup>. This integration between systems thinking and market shaping approach  
34  
35 14 presents as practical and viable option to increase access to AT.<sup>40</sup>  
36  
37 15 The strength of this study lies in its reliance on the Action Research method which ensures active  
38  
39 16 participation of all stakeholders. Yet, the task of managing the interest of the 'many' and ensuring  
40  
41  
42 17 that every opinion '*counts*' may be the big challenge of the research process. We hope to address  
43  
44 18 these through action learning and transdisciplinary approaches recommended for use in assistive  
45  
46 19 technology projects.<sup>26</sup>  
47  
48  
49  
50 20

51  
52 21 Gaps between research and practice or policy and practice gaps are some of the persistent  
53  
54 22 problems in disability studies. In adopting an action research process, we intend to avoid these  
55  
56  
57  
58  
59  
60

1  
2  
3 1 gaps to evolve a participatory and innovative process leading to development of an implementable  
4  
5  
6 2 AT policy in Malawi. The benefits of an AT policy in Malawi are numerous. However, a realistic  
7  
8 3 and implementable policy would overcome the limitations of past policies on disability in Malawi  
9  
10 4 that failed to address the health and social challenges of PWD. APPLICABLE presents as an  
11  
12  
13 5 opportunity to demonstrate an innovative and participatory way of policy development that may  
14  
15 6 be adapted for use in other settings.  
16  
17  
18  
19  
20  
21  
22  
23  
24  
25  
26  
27  
28  
29  
30  
31  
32  
33  
34  
35  
36  
37  
38  
39  
40  
41  
42  
43  
44  
45  
46  
47  
48  
49  
50  
51  
52  
53  
54  
55  
56  
57  
58  
59  
60

## 1 Acknowledgement

2 We are grateful to the members of APPLICABLE action research group and all stakeholders  
3 involved in the formative research process.

## 4 Author Contributions

5 IDE and MM conceptualized the protocol with significant contributions from EMS and AM. IDE  
6 wrote the initial draft which was reviewed by EMS, JF, MZJ, AM and MM. All authors read and  
7 approved the final version of the manuscript.

## 9 Funding

10 This work was supported by funding from the Irish Research Council (IRC) grant number-  
11 COALESCE/2019/114.

## 13 Competing interests

14 None declared.



1  
2  
3  
4  
5  
6  
7  
8  
9  
10  
11  
12  
13  
14  
15  
16  
17  
18  
19  
20  
21  
22  
23  
24  
25  
26  
27  
28  
29  
30  
31  
32  
33  
34  
35  
36  
37  
38  
39  
40  
41  
42  
43  
44  
45  
46  
47  
48  
49  
50  
51  
52  
53  
54  
55  
56  
57  
58  
59  
60

1  
2  
3  
4  
5  
6  
7  
8  
9

For peer review only

## 1 References

1. World Health Organization. World report on disability. 2011 World Disability Report. 2016.
2. Bright T, Wallace S, Kuper H. A systematic review of access to rehabilitation for people with disabilities in low-and middle-income countries. *Int J Environ Res Public Health*. 2018;15(10):2165.
3. Convention on the Rights of Persons with Disabilities (CRPD) [Internet]. 2006 [cited February 2020]. Available from: <https://www.un.org/development/desa/disabilities/convention-on-the-rights-of-persons-with-disabilities.html>.
4. Sustainable Development Goals [Internet]. 2020 [cited February 2020]. Available from: <http://www.undp.org/content/undp/en/home/sustainable-development-goals.html>.
5. Tebbutt E, Brodmann R, Borg J, MacLachlan M, Khasnabis C, Horvath R. Assistive products and the sustainable development goals (SDGs). *Globalization and health*. 2016;12(1):79.
6. Khasnabis C, Mirza Z, MacLachlan M. Opening the GATE to inclusion for people with disabilities. *The Lancet*. 2015.
7. World Health Organization. Global cooperation on assistive technology (GATE). World Health Organization, Geneva. 2014.
8. World Health Organization. Priority Assistive Products List (APL). Geneva: WHO, 2016.
9. World Health Organization. WHO model list of essential medicines: 17th list, March 2011. 2011.
10. Desmond D, Layton N, Bentley J, Boot FH, Borg J, Dhungana BM, et al. Assistive technology and people: a position paper from the first global research, innovation and education on assistive technology (GREAT) summit. *Disability and Rehabilitation: Assistive Technology*. 2018;13(5):437-44.
11. Smith RO, Scherer MJ, Cooper R, Bell D, Hobbs DA, Pettersson C, et al. Assistive technology products: a position paper from the first global research, innovation, and education on assistive technology (GREAT) summit. *Disability and Rehabilitation: Assistive Technology*. 2018;13(5):473-85.
12. de Witte L, Steel E, Gupta S, Ramos VD, Roentgen U. Assistive technology provision: towards an international framework for assuring availability and accessibility of affordable high-quality assistive technology. *Disability and Rehabilitation: Assistive Technology*. 2018;13(5):467-72.
13. Smith EM, Gowran RJ, Mannan H, Donnelly B, Alvarez L, Bell D, et al. Enabling appropriate personnel skill-mix for progressive realization of equitable access to assistive technology. *Disability and Rehabilitation: Assistive Technology*. 2018;13(5):445-53.
14. MacLachlan M, Banes D, Bell D, Borg J, Donnelly B, Fembek M, et al. Assistive technology policy: a position paper from the first global research, innovation, and education on assistive technology (GREAT) summit. *Disability and Rehabilitation: Assistive Technology*. 2018;13(5):454-66.
15. MacLachlan M, Scherer MJ. Systems thinking for assistive technology: a commentary on the GREAT summit. *Disability and Rehabilitation: Assistive Technology*. 2018;13(5):492-6.
16. Serman JD. Learning from evidence in a complex world. *American journal of public health*. 2006;96(3):505-14.
17. Holloway C, Austin V, Barbareschi G, Ramos F. Scoping Research Report on Assistive Technology. On the road for universal assistive technology coverage Prepared by the GDI Hub & partners for the UK Department for International Development Global Disability Innovation Hub. 2018.
18. United Nations. Malawi 2020 [Available from: <http://mw.one.un.org/country-profile/>].
19. National Policy on Equalisation of Opportunities for Persons with Disabilities (2006).
20. Malawi Government. National Disability Mainstreaming Strategy and Implementation Plan 2018 - 2023. Lilongwe, Malawi; 2018.
21. Loeb M, Eide AH. Living Conditions among people with activity limitations in Malawi. A national representative study. SINTEF Rapport. 2004.
22. Munthali AC. A situation analysis of persons with disabilities in Malawi. 2011.

- 1 23. World Health Organization. Global perspectives on assistive technology: proceedings of the  
2 GReAT Consultation 2019, World Health Organization, Geneva, Switzerland, 22–23 August 2019. Volume  
3 1. 2019.
- 4 24. Ngomwa PMG. Discourse on Intellectual Disability and Improved Access to Assistive  
5 Technologies in Malawi. *Frontiers in public health*. 2018;6:377.
- 6 25. Coghlan D, Brydon-Miller M. *The SAGE encyclopedia of action research*: Sage; 2014.
- 7 26. Boger J, Jackson P, Mulvenna M, Sixsmith J, Sixsmith A, Mihailidis A, et al. Principles for fostering  
8 the transdisciplinary development of assistive technologies. *Disability and Rehabilitation: Assistive  
9 Technology*. 2017;12(5):480-90.
- 10 27. Albala S, Holloway C, MacLachlan M, Banes D, Bandukda R, Walker J, et al. 'Capturing and  
11 Creating Value in the Assistive Technologies Landscape through a Mission-Oriented Approach: A New  
12 Research and Policy Agenda' AT2030 Working Paper Series (1).
- 13 28. De Brún A, O'Donovan R, McAuliffe E. Interventions to develop collectivistic leadership in  
14 healthcare settings: a systematic review. *BMC health services research*. 2019;19(1):72.
- 15 29. Michaud-Létourneau J, Gayard M, Mathisen R, Phan LTH, Weissman A, Pelletier DL. Enhancing  
16 governance and strengthening advocacy for policy change of large Collective Impact initiatives. *Maternal  
17 & child nutrition*. 2019;15:e12728.
- 18 30. Gélinas-Bronsard D, Mortenson WB, Ahmed S, Guay C, Auger C. Co-construction of an Internet-  
19 based intervention for older assistive technology users and their family caregivers: stakeholders'  
20 perceptions. *Disability and Rehabilitation: Assistive Technology*. 2019;14(6):602-11.
- 21 31. Raelin JA. What are you afraid of: Collective leadership and its learning implications.  
22 *Management Learning*. 2018;49(1):59-66.
- 23 32. Huss T, MacLachlan M. *Equity and Inclusion in Policy Processes (EquIPP): a framework to support  
24 equity & inclusion in the process of policy development, implementation and evaluation*: Global Health  
25 Press; 2016.
- 26 33. Mason P, Barnes M. Constructing theories of change: Methods and sources. *Evaluation*.  
27 2007;13(2):151-70.
- 28 34. Harrington HJ. Force Field Analysis. *The Innovation Tools Handbook, Volume 2: Evolutionary and  
29 Improvement Tools that Every Innovator Must Know*. 2016.
- 30 35. Bourdieu P. *The Social Space and the Genesis of Groups Theory and Society*. 1985.
- 31 36. Amin M, MacLachlan M, Mannan H, El Tayeb S, El Khatim A, Swartz L, et al. EquiFrame: A  
32 framework for analysis of the inclusion of human rights and vulnerable groups in health policies. *Health  
33 Hum Rights*. 2011;13(2):1-20.
- 34 37. Loitz CC, Stearns JA, Fraser SN, Storey K, Spence JC. Network analysis of inter-organizational  
35 relationships and policy use among active living organizations in Alberta, Canada. *BMC public health*.  
36 2017;17(1):649.
- 37 38. Ryan D, Emond M, Lamontagne M-E. Social network analysis as a metric for the development of  
38 an interdisciplinary, inter-organizational research team. *Journal of interprofessional care*. 2014;28(1):28-  
39 33.
- 40 39. Kania J, Kramer M. *Collective impact*: FSG; 2011.
- 41 40. MacLachlan M, McVeigh J, Cooke M, Ferri D, Holloway C, Austin V, et al. Intersections Between  
42 Systems Thinking and Market Shaping for Assistive Technology: The SMART (Systems-Market for  
43 Assistive and Related Technologies) Thinking Matrix. *Int J Environ Res Public Health*. 2018;15(12):2627.
- 44 41. Gray DE. *Doing research in the real world*: Sage; 2013.

45

1  
2  
3  
4  
5  
6  
7  
8  
9  
10  
11  
12  
13  
14  
15  
16  
17  
18  
19  
20  
21  
22  
23  
24  
25  
26  
27  
28  
29  
30  
31  
32  
33  
34  
35  
36  
37  
38  
39  
40  
41  
42  
43  
44  
45  
46  
47  
48  
49  
50  
51  
52  
53  
54  
55  
56  
57  
58  
59  
60

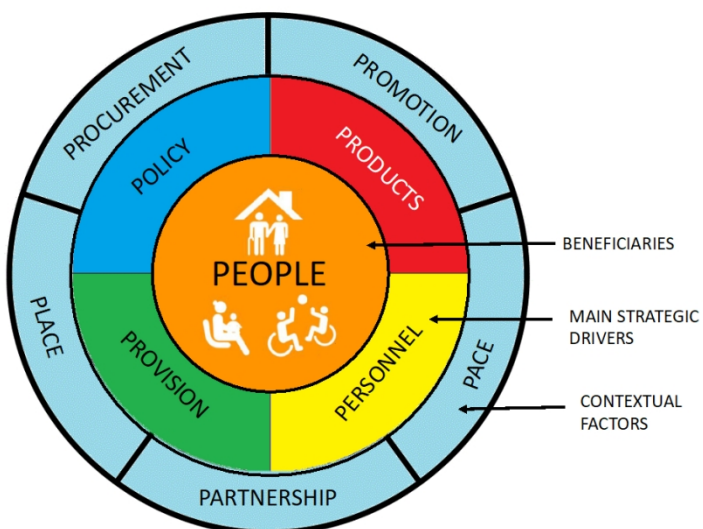

The 10 Ps of Systems Thinking for Assistive Technology Adapted from MacLachlan & Scherer, 2018, with permission)

235x132mm (144 x 144 DPI)

1  
2  
3  
4  
5  
6  
7  
8  
9  
10  
11  
12  
13  
14  
15  
16  
17  
18  
19  
20  
21  
22  
23  
24  
25  
26  
27  
28  
29  
30  
31  
32  
33  
34  
35  
36  
37  
38  
39  
40  
41  
42  
43  
44  
45  
46  
47  
48  
49  
50  
51  
52  
53  
54  
55  
56  
57  
58  
59  
60

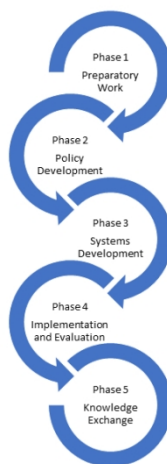

APPLICABLE research phases

338x190mm (96 x 96 DPI)

1  
2  
3  
4  
5  
6  
7  
8  
9  
10  
11  
12  
13  
14  
15  
16  
17  
18  
19  
20  
21  
22  
23  
24  
25  
26  
27  
28  
29  
30  
31  
32  
33  
34  
35  
36  
37  
38  
39  
40  
41  
42  
43  
44  
45  
46  
47  
48  
49  
50  
51  
52  
53  
54  
55  
56  
57  
58  
59  
60

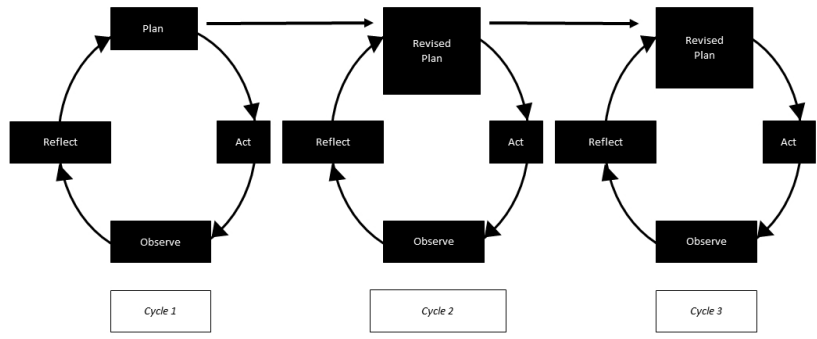

Action Research Process

338x190mm (96 x 96 DPI)

# BMJ Open

## Implementation of the Assistive Product List (APL) in Malawi through development of appropriate policy and systems: An Action Research Protocol

|                                 |                                                                                                                                                                                                                                                                                                                                                                                                                      |
|---------------------------------|----------------------------------------------------------------------------------------------------------------------------------------------------------------------------------------------------------------------------------------------------------------------------------------------------------------------------------------------------------------------------------------------------------------------|
| Journal:                        | <i>BMJ Open</i>                                                                                                                                                                                                                                                                                                                                                                                                      |
| Manuscript ID                   | bmjopen-2020-040281.R2                                                                                                                                                                                                                                                                                                                                                                                               |
| Article Type:                   | Protocol                                                                                                                                                                                                                                                                                                                                                                                                             |
| Date Submitted by the Author:   | 22-Sep-2020                                                                                                                                                                                                                                                                                                                                                                                                          |
| Complete List of Authors:       | Ebuenyi, Ikenna; National University of Ireland Maynooth, Psychology Smith, Emma; National University of Ireland Maynooth, Psychology Kafumba, Juba; University of Malawi, Centre for Social Research Jamali, Monica; University of Malawi, Centre for Social Research Munthali, Alister; University of Malawi, Centre for Social Research MacLachlan, Malcolm ; National University of Ireland Maynooth, Psychology |
| <b>Primary Subject Heading</b>: | Public health                                                                                                                                                                                                                                                                                                                                                                                                        |
| Secondary Subject Heading:      | Global health, Health policy, Health services research, Rehabilitation medicine                                                                                                                                                                                                                                                                                                                                      |
| Keywords:                       | REHABILITATION MEDICINE, PUBLIC HEALTH, SOCIAL MEDICINE, Health policy < HEALTH SERVICES ADMINISTRATION & MANAGEMENT                                                                                                                                                                                                                                                                                                 |
|                                 |                                                                                                                                                                                                                                                                                                                                                                                                                      |

SCHOLARONE™  
Manuscripts



I, the Submitting Author has the right to grant and does grant on behalf of all authors of the Work (as defined in the below author licence), an exclusive licence and/or a non-exclusive licence for contributions from authors who are: i) UK Crown employees; ii) where BMJ has agreed a CC-BY licence shall apply, and/or iii) in accordance with the terms applicable for US Federal Government officers or employees acting as part of their official duties; on a worldwide, perpetual, irrevocable, royalty-free basis to BMJ Publishing Group Ltd ("BMJ") its licensees and where the relevant Journal is co-owned by BMJ to the co-owners of the Journal, to publish the Work in this journal and any other BMJ products and to exploit all rights, as set out in our [licence](#).

The Submitting Author accepts and understands that any supply made under these terms is made by BMJ to the Submitting Author unless you are acting as an employee on behalf of your employer or a postgraduate student of an affiliated institution which is paying any applicable article publishing charge ("APC") for Open Access articles. Where the Submitting Author wishes to make the Work available on an Open Access basis (and intends to pay the relevant APC), the terms of reuse of such Open Access shall be governed by a Creative Commons licence – details of these licences and which [Creative Commons](#) licence will apply to this Work are set out in our licence referred to above.

Other than as permitted in any relevant BMJ Author's Self Archiving Policies, I confirm this Work has not been accepted for publication elsewhere, is not being considered for publication elsewhere and does not duplicate material already published. I confirm all authors consent to publication of this Work and authorise the granting of this licence.



1  
2  
3 1 Implementation of the Assistive Product List (APL) in Malawi through development of  
4  
5  
6 2 appropriate policy and systems: An Action Research Protocol  
7

8 3 Ikenna D Ebuenyi,<sup>1</sup> Emma M Smith,<sup>1</sup> Juba Kafumba,<sup>2</sup> Monica Z Jamali,<sup>2</sup> Alister Munthali,<sup>2</sup>  
9  
10 4 Malcolm MacLachlan<sup>1,3</sup>  
11  
12 5

13 6 <sup>1</sup> Assisting Living & Learning (ALL) Institute, Department of Psychology, Maynooth University,  
14  
15 7 Maynooth, Ireland  
16  
17 8

18 9 <sup>2</sup>Centre for Social Research, University of Malawi, Zomba, Malawi  
19  
20 10

21  
22 11 <sup>3</sup>Olomouc University Social Health Institute (OUSHI), Palacký University, Olomouc, Czech  
23  
24 12 Republic.  
25  
26 13

27 14  
28  
29 15  
30  
31  
32 16 Correspondence to: Dr. Ikenna D Ebuenyi; [Ikenna.ebuenyi@mu.ie](mailto:Ikenna.ebuenyi@mu.ie)  
33  
34  
35  
36  
37  
38  
39  
40  
41  
42  
43  
44  
45  
46  
47  
48  
49  
50  
51  
52  
53  
54  
55  
56  
57  
58  
59  
60

For peer review only

1  
2  
3  
4  
5  
6  
7  
8  
9  
10  
11  
12  
13  
14  
15  
16  
17  
18  
19  
20  
21  
22  
23  
24  
25  
26  
27  
28  
29  
30  
31  
32  
33  
34  
35  
36  
37  
38  
39  
40  
41  
42  
43  
44  
45  
46  
47  
48  
49  
50  
51  
52  
53  
54  
55  
56  
57  
58  
59  
60

1  
2  
3  
4  
5  
6  
7  
8  
9  
10  
11  
12  
13  
14  
15  
16  
17  
18  
19  
20  
21  
22  
23  
24  
25  
26  
27  
28  
29  
30  
31  
32  
33  
34  
35  
36  
37  
38  
39  
40  
41  
42  
43  
44  
45  
46  
47  
48  
49  
50  
51  
52  
53  
54  
55  
56  
57  
58  
59  
60

Abstract

Introduction

Assistive Technology (AT) is important for the achievement of the Sustainable Development Goals (SDGs) for persons with disabilities (PWD). Increasingly, studies suggest a significant gap between the need for and demand for and provisions of AT for PWD in low- and middle-income settings. Evidence from high income countries highlights the importance of robust AT policies to the achievement of the recommendations of the World Health Assembly on AT. In Malawi, there

1 is no standalone AT policy. The objectives of the priority Assistive Product list Implementation  
2 Creating Enablement of inclusive SDGs (APPLICABLE) project, are to propose and facilitate the  
3 development of a framework for creating effective national Assistive Technology (AT) policy and  
4 specify a system capable of implementing such policies in low-income countries such as Malawi.

#### 5 **Method and analysis**

6 We propose an action research process with stakeholders in AT in Malawi. APPLICABLE will  
7 adopt an action research paradigm, through developing a shared research agenda with  
8 stakeholders and including users of AT. This involves the formation of an Action Research Group  
9 (ARG) that will specify the priorities for practice - and policy-based evidence, in order to facilitate  
10 the development of contextually realistic and achievable policy aspirations on AT in Malawi and  
11 provide system strengthening recommendations that will ensure that the policy is implementable  
12 for their realization. We will undertake an evaluation of this policy by measuring supply and support  
13 for specific AT prior to, and following the implementation of the policy recommendations.

#### 14 **Ethics and Dissemination**

15 The study protocol was approved by Maynooth University Research Ethics Committee (SRESC-  
16 2019- 2378566) and University of Malawi Research Ethics Committee (P.01/20/10). Findings from  
17 the study will be disseminated by publication in peer-reviewed journals, presentations to  
18 stakeholders in Malawi, Ireland, and international audiences at international conferences.

19  
20 **Keywords:** Action Research, Assistive Technology Policy, Assistive Product List, Collective  
21 Leadership, Malawi

1  
2  
3  
4 1  
56 2 **Strength and Limitations of this Study**

8 3 ➤ This study will be the first in Africa to explore the development of a national Assistive  
9  
10 4 Technology policy and Assistive Product list in response to the recommendations of the  
11  
12 5 WHO.

15 6 ➤ The framework developed from this study, will lead to strengthening of the Assistive  
16  
17 7 Technology ecosystem in Malawi and may be relevant in other countries with similar  
18  
19 8 interest.

22 9 ➤ Using an emergent and action learning approach strengthens both the methods and  
23  
24 10 reflexivity of the research process and ensures active participation of all stakeholders.

27 11 ➤ The use of a flexible research methodology may lead to researcher bias and deviation from  
28  
29 12 the initial objectives may occur on account of the reliance on the contribution from multiple  
30  
31 13 stakeholders.

34 14 ➤ The proposed principle of collective leadership may be a hard sell to the stakeholders in  
35  
36 15 government who are used to the traditional single ministry lead in policy development.

38 16  
39  
40 17  
41  
42  
43  
44  
45  
46  
47  
48  
49  
50  
51  
52  
53  
54  
55  
56  
57  
58  
59  
60

## 1 Introduction

2 Persons with disabilities (PWD) often experience overt and covert barriers to participation in  
3 society and exercise of their rights.<sup>1</sup> These experiences of deprivation have dire implications  
4 for PWD, depending on their location and type of impairment. This realization has led to  
5 various efforts at both national and international level to ensure the reduction and elimination  
6 of the deprivation experience by PWD.<sup>1, 2</sup> The United Nations Convention on the Rights of  
7 Persons with Disabilities (UN CRPD) and the Sustainable Development Goals (SDGs)  
8 emphasize the importance of inclusion for PWD.<sup>3, 4</sup> The SDGs highlight the importance of  
9 social inclusion through the slogan- 'leave no one behind'.

10  
11 Assistive Technology (AT) is pivotal to achieving this mandate of inclusion of PWD.<sup>4, 5</sup> AT is a  
12 'subset of health technology systems and refers to "the development and application of  
13 organised knowledge, skills, procedures, and policies relevant to the provision, use, and  
14 assessment of assistive products".<sup>6</sup> while an assistive product is "any product (including  
15 devices, equipment, instruments, and software), either specially designed and produced or  
16 generally available, whose primary purpose is to maintain or improve an individual's  
17 functioning and independence and thereby promote their wellbeing".<sup>6</sup> Common examples of  
18 assistive products in different impairment domains include wheelchairs, white canes, hearing  
19 aids, communication boards and calendar pill boxes. In 2014, the WHO established the Global  
20 Cooperation on Assistive Technology (GATE) in order to address the global need for AT.<sup>7</sup>  
21 One of the first tasks for GATE was to establish a Priority Assistive Product List (APL)<sup>8</sup> which  
22 called for countries to develop their own context specific national APL, similar to the WHO

1  
2  
3 1 Essential medicines list.<sup>9</sup> The APL is not restrictive but a guide provided by GATE for countries  
4  
5  
6 2 to use in identifying national AT needs and priorities.<sup>8</sup>  
7  
8 3  
9  
10 4 In a bid to improve access to AT , GATE recommended five priority (5Ps) themes, namely  
11  
12  
13 5 people, policy, products, provision and personnel.<sup>8</sup> That schema put *people*, or users of AT,  
14  
15 6 at the centre and policy, products, provision and personnel, as strategic points of action to  
16  
17 7 improve access to AT around the world. In a series of position papers from the Global  
18  
19 8 Research, Innovation and Education on Assistive Technology (GREAT) summit organized by  
20  
21 9 GATE, people were identified as important drivers in AT access;<sup>10</sup> context sensitive products  
22  
23 10 were considered relevant for AT accessibility;<sup>11</sup> the development of an international standard  
24  
25 11 for provision of AT was seen as important for service user safety,<sup>12</sup> and the certification of  
26  
27 12 competency for AT personnel as important for staff training,<sup>13</sup> along with an inclusive  
28  
29 13 development of national AT policies, all to improve access to AT.<sup>14</sup> Along with these papers,  
30  
31 14 an additional 5 Ps – specifically referring to the context of AT services were also identified as  
32  
33 15 emergent from the discussions at the Summit (see Figure 1) The additional 5Ps include  
34  
35 16 Procurement, Place, Pace, Promotion and Partnership; and are key situational factors for  
36  
37 17 systems in diverse context. These situate the previous 5 Ps in national and local contexts that  
38  
39 18 determine access to AT. For instance, to ensure that *Procurement* or purchasing AT products  
40  
41 19 occur at national level in line with national and contextual factors that take into account *Place*  
42  
43 20 or differences in local settings; at a *Pace* that is feasible and can be absorbed within the  
44  
45 21 systems' capacity, using context sensitive methods to *promote* positive images of AT users  
46  
47 22 and with cross cutting *partnerships*.<sup>15</sup>  
48  
49  
50  
51  
52  
53  
54  
55  
56  
57  
58  
59  
60

1  
2  
3 1  
4  
5  
6 2 **Figure 1: The 10 Ps of Systems Thinking for Assistive Technology Adapted from MacLachlan**  
7  
8 3 **& Scherer, 2018, with permission)**  
9

10 4  
11  
12  
13 5 Sterman suggests that it is not a lack of resources, technical knowledge or commitment that  
14  
15 6 prevents us from making improvements in public health services but rather, “What thwarts us  
16  
17 7 is our lack of meaningful systems thinking capability”.<sup>16</sup> Specifically in relation to AT,  
18  
19 8 MacLachlan and Scherer argue that “a systems thinking approach allows for a meaningful  
20  
21 9 linking of components and processes, a more realistic understanding of why and where  
22  
23 10 initiatives might fail or succeed, and a more satisfying way of placing the user of assistive  
24  
25 11 technology at the centre of ideas, activities and outcomes.”<sup>15</sup>  
26  
27  
28  
29  
30  
31

32 13 **The Malawi Context**  
33

34 14 Increasingly, studies suggest low demand and provision of Assistive Technology (AT) for  
35  
36 15 PWD in low- and middle-income settings.<sup>17</sup> Malawi is a Southern African country with a  
37  
38 16 population of about 18 million. The economy is largely agrarian, and the government depends  
39  
40 17 on foreign aid. Malawi ranks 172 out 189 countries based on the United Nations Human  
41  
42 18 Development Index.<sup>18</sup> In Malawi, there are several policies and strategies at the national level  
43  
44 19 which are relevant to the experiences of PWD, each which should have relevance to AT.  
45  
46 20 Notably, the National Policy on the Equalization of Opportunities for PWD <sup>19</sup> and National  
47  
48 21 Disability Mainstreaming Strategy and Implementation Plan;<sup>20</sup> yet there are no clear direction  
49  
50 22 guidelines on how AT should be provided in the country <sup>20</sup>. It is pertinent to state that the  
51  
52  
53  
54  
55  
56  
57  
58  
59  
60

1  
2  
3 1 National Policy on the Equalization of Opportunities for Persons with Disabilities was adopted  
4  
5  
6 2 in 2006; and processes are underway to develop a successor plan on account of its expiration.  
7  
8 3 In Malawi, there is a huge gap between the need and access to services PWD.<sup>21</sup> Although  
9  
10 4 about 69% of PWD need assistive devices in Malawi, only 5% have access to them.<sup>22</sup>  
11  
12  
13 5 Evidence from high income countries highlights the importance of robust AT policies for the  
14  
15 6 achievement of the recommendations of the WHA on AT.<sup>23</sup> In Malawi, there is no standalone  
16  
17 7 AT policy.<sup>24</sup>  
18  
19  
20  
21  
22

23 9 The objectives of the Assistive Product List Implementation Creating Enablement of inclusive  
24  
25 10 SDGs (APPLICABLE) project are (i) to propose and facilitate the development of *a framework*  
26  
27 11 for creating effective national Assistive Technology (AT) policy and (ii) *specify a system*  
28  
29 12 capable of implementing that policy in Malawi.  
30  
31  
32

### 33 13 [Methods and Analysis](#)

#### 34 14 [Approach](#)

35  
36 15 The study will adopt an action research approach<sup>25</sup> and shared research agenda in  
37  
38 16 collaboration with AT stakeholders in Malawi to achieve the study objectives. Hence, this  
39  
40 17 research protocol is based on a proposed research plan by the research teams at Maynooth  
41  
42 18 University and the University of Malawi and the discussions held during the project launch and  
43  
44 19 formation of an Action Research Group (ARG) in Malawi.  
45  
46  
47 20 The relevance of action research for solving persistent problems has been extensively reported.<sup>25</sup>  
48  
49 21 Boger et al recommend collaborative transdisciplinary approach for solving persistent problems  
50  
51 22 in AT.<sup>26</sup> In adopting this method, we aim to ensure that the process of AT policy development is  
52  
53 23 participatory, collaborative and undertaken through a transparent and reflexive process with  
54  
55  
56  
57  
58  
59  
60



1 relevant stakeholders in Malawi. Equally essential is the relevance of the action research paradigm  
2 to the systems-thinking and mission-oriented approach which are central to the objectives of  
3 APPLICABLE. A systems thinking approach will ensure APPLICABLE focuses on the range of  
4 Ps (described above) to bridge the AT systems Gap in Malawi.<sup>15, 27</sup> 'Collective leadership'<sup>28, 29</sup> will  
5 be a guiding principle for the research, whereby all the participating ministries and other major  
6 stakeholders, take active leadership in the project in order to engender collective impact which is  
7 supported by research. Collective leadership refers to a group of people working together to  
8 achieve a set goal.<sup>28, 29</sup> In this case, we envision co-construction of leadership and shared  
9 responsibility by different stakeholders involved in AT in Malawi.<sup>30</sup> According to De Bruin et al.,  
10 collective leadership was associated with improved communication and role clarity, greater  
11 willingness to adopt leadership roles and 'give and take' by leaders, who became more willing to  
12 share leadership responsibilities.<sup>28</sup> Also, Michaud-Létourneau suggest that the approach is useful  
13 for changing policy where many stakeholders exist.<sup>29</sup> We will strive to minimize power imbalances  
14 and the pitfalls of collective leadership by continuous learning and knowledge sharing to co-  
15 construct what works for everyone through reflective dialogues.<sup>31</sup>

16  
17  
18 The specific research methods described below are tactical and will be decided with the ARG in  
19 an iterative process through a series of five phases, each comprised of Action Research Cycles.  
20 The content for each of those action research cycles will be decided with key stakeholders in AT  
21 in Malawi through the formation of an ARG.

22

1  
2  
3  
4 1  
5 2 **Formative Research**  
6  
7 3 Prior to the project launch, a series of steps were undertaken as part of the formative research  
8  
9 4 process. Initial meetings were held with the Ministries of Gender, Children, Disability and Social  
10  
11 5 Welfare (MoGCD&SW), Health, Education, and Labour, Disabled People's Organisations, other  
12  
13 6 civil society, service providers, donors, industry and UN agencies. Presentation and discussions  
14  
15 7 on establishing a AT policy and implementation systems in Malawi were discussed and the  
16  
17 8 stakeholders expressed interest in the 36 months (January 2019-December 2021) project.

19 9 The project launch was held on the 6<sup>th</sup> of December 2019 with over 40 stakeholders drawn from  
20  
21 10 five broad stakeholder groups namely:

- 26 11 1. Government Stakeholders (e.g. Ministries of Health, Education, Gender and Persons with  
27  
28 12 Disabilities and the Elderly)
- 31 13 2. Non-governmental non-profit stakeholders (e.g. Federation of Disability Organization in  
32  
33 14 Malawi (FEDOMA), Beit Cure International Hospital (BT), Malawi Council for the  
34  
35 15 Handicapped (MACOHA))
- 38 16 3. Non-governmental for-profit stakeholders (Pharmacist, Physiotherapist)
- 40  
41 17 4. Academic Institutions
- 42  
43 18 5. United Nation agencies (e.g. UNICEF, WHO, UNDP)

45 19 It is pertinent to state that persons with disabilities and users AT products are not restricted to only  
46  
47 20 group two but are also in the other groups. They are involved in all the research processes and  
48  
49 21 as part of the ARG.

52 22 The formative research stage describes activities undertaken prior to the project launch. The  
53  
54 23 following sections describe the proposed research phases developed following the project launch.

1  
2  
3  
4 1  
5  
6 2 **Research Phases**  
7  
8 3 The study will be conducted in five phases. The details of each phase will be collaboratively  
9  
10 4 decided during the action research project, but these phases will guide the work throughout the  
11  
12 5 project.

13  
14 6 The five phases of the research are Preparatory Work, Policy Development, Systems  
15  
16 7 Development, Implementation and Evaluation, and Knowledge Exchange (Figure 2).  
18  
19 8

20  
21  
22 9  
23  
24 10 **Figure 2: APPLICABLE research phases**  
25  
26 11

27  
28  
29 12 *Phase 1- Preparatory Work.* This stage starts with the project launch and formation of the Action  
30  
31 13 Research Group (ARG). Following the project launch, 15 persons were invited from the  
32  
33 14 stakeholders present to join the ARG. Members of the ARG have been purposively selected to  
34  
35 15 work on the policy development and implementation.

36  
37  
38 16 The ARG adopted the proposed process and agreed that:

- 39  
40  
41 17
  - A realistic AT policy and delivery system is needed in Malawi; and
  - That ownership of the policy will be further discussed and that initially it will be co-led by

42  
43 18 members of the Action Research Group; and

44  
45 19

  - Data will be stored at the Centre for Social Research, Malawi.

46  
47  
48 20

49  
50 21 The launch was organized in collaboration with Clinton Health Access Initiative (CHAI) who  
51  
52 22 previously conducted a baseline survey on AT in Malawi. They presented the results on their  
53  
54 23 survey, after which APPLICABLE was introduced by the Principal investigators from Malawi and

1  
2  
3 1 Ireland. This was followed by reactions from stakeholders and selection of the ARG from the  
4  
5  
6 2 stakeholders' present. The discussions with the ARG, informed the proposed research phases  
7  
8 3 (Table 1):  
9

10 4  
11  
12  
13 5 The nature of action research is that the methodology of the group is decided upon by the group  
14  
15 6 and is likely to change and evolve as they address different issues.<sup>25</sup> Following an action research  
16  
17 7 approach, the group will thus **plan** what to do – take clear and specific **action** – **observe** and collect  
18  
19 8 data on the consequences of this action – and as a group **reflect** on the implications for designing  
20  
21 9 policy to and systems to promote access to AT. In order to conduct preparatory work, we will  
22  
23 10 conduct a literature review of academic and grey literature in assistive technology in Malawi and  
24  
25 11 review data available from existing datasets. In addition, we will conduct interviews with users and  
26  
27 12 providers of AT guided by the data from a Country Capacity assessment by the Clinton Health  
28  
29 13 Access Initiative (CHAI) in partnership with the Assistive Technology 2030 project. The research  
30  
31 14 team will also assess inclusivity of the process of policy development and implementation in  
32  
33 15 existing policies using the EquIPP (Equity and Inclusion in Policy Processes) tool.<sup>32</sup> The EquIPP  
34  
35 16 <sup>32</sup> tool was developed with the United Nations Partnership on the Rights of Persons with  
36  
37 17 Disabilities (UNPRPD) and measures, evaluates and makes recommendations for improvement  
38  
39 18 in regard to inclusive policy development and evaluation. It consists of 17 Key Actions that provide  
40  
41 19 guidance on how to ensure an equitable and inclusive policy development process.  
42  
43  
44  
45  
46  
47  
48  
49  
50

51 21 Phase 2 – Policy Development: Phase 2 will focus on the development of a draft policy, guided by  
52  
53 22 the EquIPP framework for inclusive policy development. A theory of change<sup>33</sup> will be undertaken  
54  
55  
56  
57  
58  
59  
60

1  
2  
3 1 to guide the APL development while Force Field Analysis<sup>34</sup> to explore the political economy and  
4  
5  
6 2 power relationships on AT in Malawi will be conducted. Force Field Analysis<sup>34</sup> is a qualitative  
7  
8 3 research method that conceptualises how forces for and against change are poised and thus  
9  
10 4 helps in the systematic analysis of possible change processes. Bourdesian Analysis<sup>35</sup> applies  
11  
12 5 the idea of the social space being composed of fields of identify and power relations which are  
13  
14  
15 6 likely to influence change process.  
16  
17  
18 7

19  
20 8 The ARG will design a Draft AT Policy, supported by the research team, drawing on the literature  
21  
22 9 reviewed above and taking into account the Malawian context. It is anticipated that the resultant  
23  
24  
25 10 draft may also be assessed for the degree to which it promotes inclusivity (e.g. service users,  
26  
27 11 gender, rurality, poverty, etc.) using the EquiFrame tool.<sup>36</sup> EquiFrame<sup>36</sup> which is a tool for  
28  
29  
30 12 Evaluating and Promoting the Inclusion of Vulnerable Groups and Core Concepts of Human  
31  
32 13 Rights in Health Policy Documents. It consists of 21 Core Concepts that covers issues relating to  
33  
34  
35 14 universal, equitable and accessible healthcare.  
36  
37  
38  
39  
40  
41  
42  
43

44 17 *Phase 3-System Development:* This phase involves the development of system strengthening  
45  
46 18 recommendations based on knowledge and information generated from the policy development  
47  
48 19 process. The ARG will also address what implications there are at the systems level for delivering  
49  
50 20 on the Draft AT Policy; and to recommend how these can be addressed in the Malawian context.  
51  
52 21 Data will be used to demonstrate the link between the different government ministries and  
53  
54 22 stakeholders to the SDG matrix; and thus highlight the relevance of AT to achievement of the  
55  
56  
57  
58  
59  
60

1  
2  
3 1 SDGs.<sup>4</sup> The SDG Matrix will be used to demonstrate the concept that that assistive products have  
4  
5  
6 2 a direct impact on the achievement of the SGDs. Tebbutt and colleagues suggest that assistive  
7  
8 3 products can be both mediators and moderators of SDG achievement <sup>5</sup> A network analysis<sup>37, 38</sup>  
9  
10 4 will be undertaken to explore the strength and nature of relationship between stakeholders on AT  
11  
12  
13 5 in Malawi. The collective leadership approach will be very useful in this phase to ensure collective  
14  
15 6 impact and system development.<sup>39</sup>  
16  
17  
18 7

19  
20 8 *Phase 4- Implementation and Evaluation.* This phase marks the beginning of the implementation  
21  
22 9 and evaluation of the AT policy developed. Over an agreed period, the participating government  
23  
24  
25 10 ministries and stakeholders will identify a suitable service provider to trial the implementation of  
26  
27 11 the Draft AT Policy, with the support of the identified ministry and the research team. While the  
28  
29  
30 12 ARG will be in a continuing process of evaluation and feedback themselves, stakeholders who  
31  
32 13 attended the project launch will be asked to attend a project review meeting where the ARG and  
33  
34 14 research team will present findings. The ARG will also identify AT service users to present their  
35  
36  
37 15 experiences during this workshop. The SMART (Systems-Market for Assistive and Related  
38  
39 16 Technologies) Thinking Matrix framework will be used during the implementation and  
40  
41  
42 17 evaluation.<sup>40</sup> The SMART Thinking Matrix is a framework for conceptualizing intersections  
43  
44 18 between systems levels and market shaping for assistive technology and was derived from a  
45  
46 19 systematic review of the interface between these two literatures.<sup>40</sup>  
47  
48  
49 20

50  
51 21 *Phase 5-Knowledge Exchange.* This phase entails ensuring knowledge exchange impact of the  
52  
53  
54 22 research process. The ARG and the Research Team will use results from previous phases to  
55  
56  
57  
58  
59  
60

1 identify key features that might be relevant for a generic National Framework for AT, that will be  
2 generalised to other countries and contexts. In keeping with Action Research methodology, expert  
3 advisers (all of whom we have worked with before) who will be available to provide support to the  
4 ARG shall provide feedback on the research process. This support could be provided either  
5 virtually or through attendance at project meeting in Malawi; as determined by the needs of the  
6 ARG and the available budget of the project.

### 8 Action Research Methodology

9 Throughout the five phases described above, we will use an Action Research Methodology<sup>25</sup>  
10 informed by the needs of the ARG. This will take the form of Action Research Cycles each  
11 consisting of four components: plan, act, observe, and reflect (Figure 3), to answer the research  
12 questions which are posed by the ARG, and contribute to the development of each phase.

### 16 **Figure 3. Action Research Process**

18 Throughout these cycles, we will use multiple study methods to address the questions posed by  
19 the ARG (Table 1). For each research methodology, specific study procedures (Table 1) to  
20 produce requested content for use in the action research cycle will be decided with the ARG.

1

2 **Table 1: Planned and anticipated research methodology**

| Research Phase                                                                                       | Methodology                                                                                                                                                                                                                                                                                                                                                                                                                                                                                                                 |
|------------------------------------------------------------------------------------------------------|-----------------------------------------------------------------------------------------------------------------------------------------------------------------------------------------------------------------------------------------------------------------------------------------------------------------------------------------------------------------------------------------------------------------------------------------------------------------------------------------------------------------------------|
| <p><b>Phase 1 - Preparatory Work: Understanding the Assistive technology context in Malawi</b></p>   | <ol style="list-style-type: none"> <li>1. <b>Literature Review:</b> Assistive technology service delivery and policy review using academic and grey literature</li> <li>2. <b>Data Review:</b> Secondary data analysis of existing datasets (i.e. Census, SINTEF dataset) and interviews</li> <li>3. <b>Country Capacity Assessment:</b> In collaboration with AT2030 and the Clinton Health Access Initiative</li> <li>4. <b>EquiPP:</b> Review of existing policies for inclusive policy development processes</li> </ol> |
| <p><b>Phase 2 – Policy Development: Identifying Key Change Agents and Contexts</b></p>               | <ol style="list-style-type: none"> <li>5. <b>EquiPP:</b> Inclusive policy development process</li> <li>6. <b>Theory of Change:</b> Development of theory of change for APL development</li> <li>7. <b>Field Analysis:</b> Force Field Analysis and Bourdesian Analysis to understand political economy and power relationships</li> </ol>                                                                                                                                                                                   |
| <p><b>Phase 3 - Systems Development: Engagement in Collective Leadership to Achieve the SDGs</b></p> | <ol style="list-style-type: none"> <li>8. <b>SDG Matrix:</b> Linking ministries to SDG achievement and role of AT</li> <li>9. <b>Network Analysis:</b> Strength and nature of existing networks between key stakeholders in AT in Malawi</li> </ol>                                                                                                                                                                                                                                                                         |
| <p><b>Phase 4 – Implementation and Evaluation: Delivering a Policy</b></p>                           | <ol style="list-style-type: none"> <li>10. <b>Systems Coherence Development:</b> Addressing gaps in existing network to strengthen coherence for GATE 10Ps</li> <li>11. <b>Market Shaping Analysis:</b> Smart Thinking Matrix</li> </ol>                                                                                                                                                                                                                                                                                    |



|                                                                                      |                                                                                                                                                                                                                                           |
|--------------------------------------------------------------------------------------|-------------------------------------------------------------------------------------------------------------------------------------------------------------------------------------------------------------------------------------------|
| <p><b>or Strategy in Context</b></p>                                                 | <p>12. <b>Piloting:</b> Implementation of strategy in key areas with review of process and outcomes</p>                                                                                                                                   |
| <p><b>Phase 5 – Knowledge Exchange: Applying Knowledge to the Global Context</b></p> | <p>13. <b>Policy Framework:</b> Identification of key concepts for broader applicability to other contexts</p> <p>14. <b>Systems Implementation Framework:</b> Specification of implementation system to be applied to other contexts</p> |

## Data collection and Management

All data including the transcripts will be stored according to the provisions of the Centre for Social Research, University of Malawi Research Practice and Procedures. Hence, all primary data will be held permanently following its acquisition and used in publication for the purpose of this study and recommendations of the ARG. All data will be anonymized, and informed consent will be obtained from all study participants and stakeholders at every stage of the research process. Study participants entail all who are recruited or invited to participate in the study and may include stakeholders who are users or providers of AT. A data dictionary will be kept and maintained for both quantitative and qualitative data to ensure that all authorized individuals are able to reuse the data. Secondary data will be obtained from National the Statistics Office and National Survey on living conditions of persons with disabilities (SINTEF).

## Data Analysis

The data analysis method adopted will be dependent on the data type from the different phases of the study. Quantitative data will be reported according to the Strengthening the Reporting of Observational Studies in Epidemiology (STROBE) guidelines while qualitative data will be

1 reported using the Consolidated Criteria for Reporting Qualitative Research (COREQ).<sup>41</sup> Analytic  
2 review methods will be used for literature and document review in phases 1 and 5.<sup>42</sup> For qualitative  
3 data (From phases 1-5), content and framework analysis will be used. Both deductive and  
4 inductive methods will be adopted by the research team to code available data, depending on the  
5 nature of data and question posed by the ARG. Data coding will be conducted by independent  
6 members of the research team and assessed for congruence, with differences resolved by the  
7 research team. A process of thematic analysis will be subsequently used to identify main and sub  
8 themes relevant for the study. For quantitative data (Phase 1, 2 and 3), descriptive statistics and  
9 regression analysis will be undertaken to understand factors relevant for improved access to AT  
10 and creation of a nation AT policy in Malawi.<sup>42</sup>

11 The EquIPP and EquiFrame tools<sup>32, 36</sup> will also be used to analyze existing policy on disability and  
12 the proposed AT policy. Quantitative data will be analysed using the Statistical Package for the  
13 Social Sciences (SPSS) version 23 while qualitative data will be analysed via *Atlas. ti version*  
14 *7.5.18*. All data will be anonymized and not contain any personal identifiers.

#### 16 Patient and Public Involvement

17 No patient involved

#### 19 Ethics and Dissemination

20 Ethical approval was obtained from the Maynooth University Social Research Ethics Committee  
21 (SRESC-2019- 2378566) and University of Malawi Research Ethics Committee (UNIMAREC)  
22 (P.01/20/10).

1  
2  
3 1 The results from the study will be disseminated through presentations at conferences both  
4  
5  
6 2 within Malawi and abroad with stakeholders in and at international conferences; and publishing  
7  
8 3 in peer-reviewed journals and on the websites of Maynooth and University of Malawi  
9  
10  
11 4

## 14 5 Discussion

15  
16 6 The aim of APPLICABLE is to develop a national AT policy for Malawi and to contribute to the  
17  
18 7 development of a framework in the process that may be relevant in other countries. Also, it is  
19  
20 8 anticipated that the process will evolve a framework that will lead to strengthening of the AT  
21  
22 9 ecosystem through collaborative action and partnership with all stakeholders.  
23  
24  
25  
26 10

27  
28 11 These objectives informed the adoption of the Action Research approach that sets out on a  
29  
30 12 research path without specific research agenda but entrusts the direction of the research to  
31  
32 13 local and informed actors on AT in Malawi, to ensure a shared research agenda and  
33  
34 14 development of context useful knowledge. This approach is in line with the ethos of the Mission  
35  
36 15 Oriented Approach for AT proposed by Albala and colleagues.<sup>27</sup> It also avoids the common  
37  
38 16 pitfall of most implementation research, where research is done for rather than with local  
39  
40 17 stakeholders. Also, the action research approach ensures the development of context specific  
41  
42 18 approaches for the development of APL for Malawi. Low income settings like Malawi have  
43  
44 19 particular AT challenges that must take into consideration the local realities rather than  
45  
46 20 adopting recommendations from high income settings with different socio-economic milieu.  
47  
48 21 According to Gélinas-Bronsard and colleagues, accessing AT is a matter of resources.<sup>30</sup> While  
49  
50 22 it is obvious that factors outside finance play a role in the access and utilization of AT, its  
51  
52  
53  
54  
55  
56  
57  
58  
59  
60

1  
2  
3 1 pivotal role in LMICS, where health care insurance and social welfare packages are absent,  
4  
5  
6 2 is a key issue that the action research approach must explicitly address.  
7

8  
9  
10 4 The Collective Leadership approach will help to ensure all stakeholders engaged in the action  
11  
12  
13 5 research approach feel a sense of ownership and promote buy-in at all levels in the  
14  
15 6 implementation phase. Historically, in Malawi and in other countries, a single ministry  
16  
17 7 maintains responsibility for the development and implementation of policy – considered the  
18  
19 8 policy holder. In this case, either the ministry of Health or Gender and disability or Education  
20  
21 9 may desire to claim ownership on account of perceived ‘proximity’ of AT to their ministry.  
22  
23  
24  
25 10 However, AT is more than just a health issue, or disability problem as shown by data from our  
26  
27 11 SDG matrix. It cuts across various sectors such as education, sports and therefore require  
28  
29 12 collaborative approach. As shown by Tebbut and colleagues, AT is relevant for the  
30  
31 13 achievement of each of the 17 SDGs;<sup>5</sup> hence requires cross cutting collaboration between all  
32  
33 14 players in Malawi. Interestingly, the collective leadership approach is noted to be useful for  
34  
35 15 changing policy where many stakeholders exist and led to relevant policy changes in infant  
36  
37 16 and young child feeding policies in seven countries in Southeast Asia.<sup>29</sup> Similarly, a systematic  
38  
39 17 review by De Brun and colleagues showed that collectivistic leadership was associated  
40  
41 18 positive outcomes in health care settings in Europe and North America.<sup>28</sup> It is pertinent to note  
42  
43 19 that in order to solve social problems and achieve collective impact, commitment of all relevant  
44  
45 20 actors is crucial<sup>39</sup>. This integration between systems thinking and market shaping approach  
46  
47 21 presents as practical and viable option to increase access to AT.<sup>40</sup>  
48  
49  
50  
51  
52  
53  
54  
55  
56  
57  
58  
59  
60

1  
2  
3 1 The strength of this study lies in its reliance on the Action Research method which ensures active  
4  
5  
6 2 participation of all stakeholders. Yet, the task of managing the interest of the 'many' and ensuring  
7  
8 3 that every opinion '*counts*' may be the big challenge of the research process. We hope to address  
9  
10 4 these through action learning and transdisciplinary approaches recommended for use in assistive  
11  
12  
13 5 technology projects.<sup>26</sup>  
14  
15

16  
17 6  
18 7 Gaps between research and practice or policy and practice gaps are some of the persistent  
19  
20 8 problems in disability studies. In adopting an action research process, we intend to avoid these  
21  
22 9 gaps to evolve a participatory and innovative process leading to development of an implementable  
23  
24  
25 10 AT policy in Malawi. The benefits of an AT policy in Malawi are numerous. However, a realistic  
26  
27  
28 11 and implementable policy would overcome the limitations of past policies on disability in Malawi  
29  
30 12 that failed to address the health and social challenges of PWD. APPLICABLE presents as an  
31  
32  
33 13 opportunity to demonstrate an innovative and participatory way of policy development that may  
34  
35 14 be adapted for use in other settings.  
36  
37

38 15

39 16

40 17

41 18

42 19

43 20

44 21

## 1 Acknowledgement

2 We are grateful to the members of APPLICABLE action research group and all stakeholders  
3 involved in the formative research process.

## 4 Author Contributions

5 IDE and MM conceptualized the protocol with significant contributions from EMS and AM. IDE  
6 wrote the initial draft which was reviewed by EMS, JK, MZJ, AM and MM. All authors read and  
7 approved the final version of the manuscript.

## 9 Funding

10 This work was supported by funding from the Irish Research Council (IRC) grant number-  
11 COALESCE/2019/114.

## 13 Competing interests

14 None declared.

1  
2  
3  
4  
5  
6  
7  
8  
9  
10  
11  
12  
13  
14  
15  
16  
17  
18  
19  
20  
21  
22  
23  
24  
25  
26  
27  
28  
29  
30  
31  
32  
33  
34  
35  
36  
37  
38  
39  
40  
41  
42  
43  
44  
45  
46  
47  
48  
49  
50  
51  
52  
53  
54  
55  
56  
57  
58  
59  
60

1  
2  
3  
4  
5  
6  
7  
8  
9

For peer review only





- 1  
2  
3 1 on assistive technology (GREAT) summit. *Disability and Rehabilitation: Assistive Technology*.  
4  
5  
6 2 2018;13(5):437-44.  
7  
8 3 11. Smith RO, Scherer MJ, Cooper R, Bell D, Hobbs DA, Pettersson C, et al. Assistive  
9  
10 4 technology products: a position paper from the first global research, innovation, and education on  
11  
12 5 assistive technology (GREAT) summit. *Disability and Rehabilitation: Assistive Technology*.  
13  
14 6 2018;13(5):473-85.  
15  
16  
17 7 12. de Witte L, Steel E, Gupta S, Ramos VD, Roentgen U. Assistive technology provision:  
18  
19 8 towards an international framework for assuring availability and accessibility of affordable high-  
20  
21 9 quality assistive technology. *Disability and Rehabilitation: Assistive Technology*. 2018;13(5):467-  
22  
23 10 72.  
24  
25  
26 11 13. Smith EM, Gowran RJ, Mannan H, Donnelly B, Alvarez L, Bell D, et al. Enabling  
27  
28 12 appropriate personnel skill-mix for progressive realization of equitable access to assistive  
29  
30 13 technology. *Disability and Rehabilitation: Assistive Technology*. 2018;13(5):445-53.  
31  
32  
33 14 14. MacLachlan M, Banes D, Bell D, Borg J, Donnelly B, Fembek M, et al. Assistive technology  
34  
35 15 policy: a position paper from the first global research, innovation, and education on assistive  
36  
37 16 technology (GREAT) summit. *Disability and Rehabilitation: Assistive Technology*. 2018;13(5):454-  
38  
39 17 66.  
40  
41  
42 18 15. MacLachlan M, Scherer MJ. Systems thinking for assistive technology: a commentary on  
43  
44 19 the GREAT summit. *Disability and Rehabilitation: Assistive Technology*. 2018;13(5):492-6.  
45  
46  
47 20 16. Sterman JD. Learning from evidence in a complex world. *American journal of public health*.  
48  
49 21 2006;96(3):505-14.  
50  
51  
52  
53  
54  
55  
56  
57  
58  
59  
60

- 1  
2  
3  
4 1 17. Holloway C, Austin V, Barbareschi G, Ramos F. Scoping Research Report on Assistive  
5  
6 2 Technology. On the road for universal assistive technology coverage Prepared by the GDI Hub &  
7  
8 3 partners for the UK Department for International Development Global Disability Innovation Hub.  
9  
10 4 2018.  
11  
12  
13 5 18. United Nations. Malawi 2020 [Available from: <http://mw.one.un.org/country-profile/>.  
14  
15 6 19. National Policy on Equalisation of Opportunities for Persons with Disabilities (2006).  
16  
17 7 20. Malawi Government. National Disability Mainstreaming Strategy and Implementation Plan  
18  
19 8 2018 - 2023. Lilongwe, Malawi; 2018.  
20  
21  
22 9 21. Loeb M, Eide AH. Living Conditions among people with activity limitations in Malawi. A  
23  
24 10 national representative study. SINTEF Rapport. 2004.  
25  
26  
27 11 22. Munthali AC. A situation analysis of persons with disabilities in Malawi. 2011.  
28  
29  
30 12 23. World Health Organization. Global perspectives on assistive technology: proceedings of  
31  
32 13 the GReAT Consultation 2019, World Health Organization, Geneva, Switzerland, 22–23 August  
33  
34 14 2019. Volume 1. 2019.  
35  
36  
37 15 24. Ngomwa PMG. Discourse on Intellectual Disability and Improved Access to Assistive  
38  
39 16 Technologies in Malawi. *Frontiers in public health*. 2018;6:377.  
40  
41  
42 17 25. Coghlan D, Brydon-Miller M. *The SAGE encyclopedia of action research*: Sage; 2014.  
43  
44 18 26. Boger J, Jackson P, Mulvenna M, Sixsmith J, Sixsmith A, Mihailidis A, et al. Principles for  
45  
46 19 fostering the transdisciplinary development of assistive technologies. *Disability and Rehabilitation:*  
47  
48 20 *Assistive Technology*. 2017;12(5):480-90.

- 1  
2  
3  
4 1 27. Albala S, Holloway C, MacLachlan M, Banes D, Bandukda R, Walker J, et al. 'Capturing  
5  
6 2 and Creating Value in the Assistive Technologies Landscape through a Mission-Oriented  
7  
8 3 Approach: A New Research and Policy Agenda' AT2030 Working Paper Series (1).  
9  
10 4 28. De Brún A, O'Donovan R, McAuliffe E. Interventions to develop collectivistic leadership in  
11  
12 5 healthcare settings: a systematic review. BMC health services research. 2019;19(1):72.  
13  
14 6 29. Michaud-Létourneau I, Gayard M, Mathisen R, Phan LTH, Weissman A, Pelletier DL.  
15  
16 7 Enhancing governance and strengthening advocacy for policy change of large Collective Impact  
17  
18 8 initiatives. Maternal & child nutrition. 2019;15:e12728.  
19  
20 9 30. Gélinas-Bronsard D, Mortenson WB, Ahmed S, Guay C, Auger C. Co-construction of an  
21  
22 10 Internet-based intervention for older assistive technology users and their family caregivers:  
23  
24 11 stakeholders' perceptions. Disability and Rehabilitation: Assistive Technology. 2019;14(6):602-11.  
25  
26 12 31. Raelin JA. What are you afraid of: Collective leadership and its learning implications.  
27  
28 13 Management Learning. 2018;49(1):59-66.  
29  
30 14 32. Huss T, MacLachlan M. Equity and Inclusion in Policy Processes (EquIPP): a framework  
31  
32 15 to support equity & inclusion in the process of policy development, implementation and evaluation:  
33  
34 16 Global Health Press; 2016.  
35  
36 17 33. Mason P, Barnes M. Constructing theories of change: Methods and sources. Evaluation.  
37  
38 18 2007;13(2):151-70.  
39  
40 19 34. Harrington HJ. Force Field Analysis. The Innovation Tools Handbook, Volume 2:  
41  
42 20 Evolutionary and Improvement Tools that Every Innovator Must Know. 2016.  
43  
44 51 35. Bourdieu P. The Social Space and the Genesis of Groups Theory and Society. 1985.  
45  
46  
47  
48  
49  
50  
51  
52  
53  
54  
55  
56  
57  
58  
59  
60

- 1  
2  
3 1 36. Amin M, MacLachlan M, Mannan H, El Tayeb S, El Khatim A, Swartz L, et al. EquiFrame:  
4  
5  
6 2 A framework for analysis of the inclusion of human rights and vulnerable groups in health policies.  
7  
8 3 Health Hum Rights. 2011;13(2):1-20.  
9  
10 4 37. Loitz CC, Stearns JA, Fraser SN, Storey K, Spence JC. Network analysis of inter-  
11  
12 5 organizational relationships and policy use among active living organizations in Alberta, Canada.  
13  
14 6 BMC public health. 2017;17(1):649.  
15  
16 7 38. Ryan D, Emond M, Lamontagne M-E. Social network analysis as a metric for the  
17  
18 8 development of an interdisciplinary, inter-organizational research team. Journal of  
19  
20 9 interprofessional care. 2014;28(1):28-33.  
21  
22  
23 10 39. Kania J, Kramer M. Collective impact: FSG; 2011.  
24  
25 11 40. MacLachlan M, McVeigh J, Cooke M, Ferri D, Holloway C, Austin V, et al. Intersections  
26  
27 12 Between Systems Thinking and Market Shaping for Assistive Technology: The SMART (Systems-  
28  
29 13 Market for Assistive and Related Technologies) Thinking Matrix. Int J Environ Res Public Health.  
30  
31 14 2018;15(12):2627.  
32  
33  
34 15 41. Network E. Enhancing the quality and transparency of health research. Available at: www  
35  
36 16 equator-network.org Accessed February. 2014;10.  
37  
38  
39 17 42. Gray DE. Doing research in the real world: Sage; 2013.  
40  
41  
42  
43  
44  
45  
46  
47  
48  
49  
50  
51  
52  
53  
54  
55  
56  
57  
58  
59  
60

1  
2  
3  
4  
5  
6  
7  
8  
9  
10  
11  
12  
13  
14  
15  
16  
17  
18  
19  
20  
21  
22  
23  
24  
25  
26  
27  
28  
29  
30  
31  
32  
33  
34  
35  
36  
37  
38  
39  
40  
41  
42  
43  
44  
45  
46  
47  
48  
49  
50  
51  
52  
53  
54  
55  
56  
57  
58  
59  
60



The 10 Ps of Systems Thinking for Assistive Technology Adapted from MacLachlan & Scherer, 2018, with permission)

235x132mm (144 x 144 DPI)

1  
2  
3  
4  
5  
6  
7  
8  
9  
10  
11  
12  
13  
14  
15  
16  
17  
18  
19  
20  
21  
22  
23  
24  
25  
26  
27  
28  
29  
30  
31  
32  
33  
34  
35  
36  
37  
38  
39  
40  
41  
42  
43  
44  
45  
46  
47  
48  
49  
50  
51  
52  
53  
54  
55  
56  
57  
58  
59  
60



APPLICABLE research phases  
338x190mm (96 x 96 DPI)

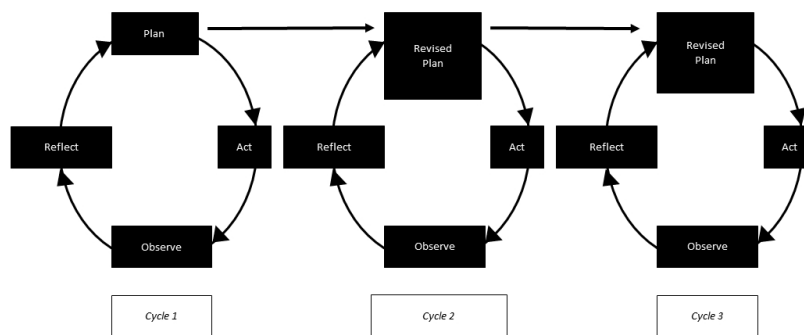

Action Research Process

338x190mm (96 x 96 DPI)

# BMJ Open

## Implementation of the Assistive Product List (APL) in Malawi through development of appropriate policy and systems: An Action Research Protocol

|                                 |                                                                                                                                                                                                                                                                                                                                                                                                                      |
|---------------------------------|----------------------------------------------------------------------------------------------------------------------------------------------------------------------------------------------------------------------------------------------------------------------------------------------------------------------------------------------------------------------------------------------------------------------|
| Journal:                        | <i>BMJ Open</i>                                                                                                                                                                                                                                                                                                                                                                                                      |
| Manuscript ID                   | bmjopen-2020-040281.R3                                                                                                                                                                                                                                                                                                                                                                                               |
| Article Type:                   | Protocol                                                                                                                                                                                                                                                                                                                                                                                                             |
| Date Submitted by the Author:   | 11-Oct-2020                                                                                                                                                                                                                                                                                                                                                                                                          |
| Complete List of Authors:       | Ebuenyi, Ikenna; National University of Ireland Maynooth, Psychology Smith, Emma; National University of Ireland Maynooth, Psychology Kafumba, Juba; University of Malawi, Centre for Social Research Jamali, Monica; University of Malawi, Centre for Social Research Munthali, Alister; University of Malawi, Centre for Social Research MacLachlan, Malcolm ; National University of Ireland Maynooth, Psychology |
| <b>Primary Subject Heading</b>: | Public health                                                                                                                                                                                                                                                                                                                                                                                                        |
| Secondary Subject Heading:      | Global health, Health policy, Health services research, Rehabilitation medicine                                                                                                                                                                                                                                                                                                                                      |
| Keywords:                       | REHABILITATION MEDICINE, PUBLIC HEALTH, SOCIAL MEDICINE, Health policy < HEALTH SERVICES ADMINISTRATION & MANAGEMENT                                                                                                                                                                                                                                                                                                 |
|                                 |                                                                                                                                                                                                                                                                                                                                                                                                                      |

SCHOLARONE™  
Manuscripts





I, the Submitting Author has the right to grant and does grant on behalf of all authors of the Work (as defined in the below author licence), an exclusive licence and/or a non-exclusive licence for contributions from authors who are: i) UK Crown employees; ii) where BMJ has agreed a CC-BY licence shall apply, and/or iii) in accordance with the terms applicable for US Federal Government officers or employees acting as part of their official duties; on a worldwide, perpetual, irrevocable, royalty-free basis to BMJ Publishing Group Ltd ("BMJ") its licensees and where the relevant Journal is co-owned by BMJ to the co-owners of the Journal, to publish the Work in this journal and any other BMJ products and to exploit all rights, as set out in our [licence](#).

The Submitting Author accepts and understands that any supply made under these terms is made by BMJ to the Submitting Author unless you are acting as an employee on behalf of your employer or a postgraduate student of an affiliated institution which is paying any applicable article publishing charge ("APC") for Open Access articles. Where the Submitting Author wishes to make the Work available on an Open Access basis (and intends to pay the relevant APC), the terms of reuse of such Open Access shall be governed by a Creative Commons licence – details of these licences and which [Creative Commons](#) licence will apply to this Work are set out in our licence referred to above.

Other than as permitted in any relevant BMJ Author's Self Archiving Policies, I confirm this Work has not been accepted for publication elsewhere, is not being considered for publication elsewhere and does not duplicate material already published. I confirm all authors consent to publication of this Work and authorise the granting of this licence.

1  
2  
3 1 Implementation of the Assistive Product List (APL) in Malawi through development of  
4  
5  
6 2 appropriate policy and systems: An Action Research Protocol  
7

8 3 Ikenna D Ebuenyi,<sup>1</sup> Emma M Smith,<sup>1</sup> Juba Kafumba,<sup>2</sup> Monica Z Jamali,<sup>2</sup> Alister Munthali,<sup>2</sup>  
9  
10 4 Malcolm MacLachlan<sup>1,3</sup>  
11  
12 5

13 6 <sup>1</sup> Assisting Living & Learning (ALL) Institute, Department of Psychology, Maynooth University,  
14  
15 7 Maynooth, Ireland  
16  
17 8

18 9 <sup>2</sup>Centre for Social Research, University of Malawi, Zomba, Malawi  
19  
20 10

21  
22 11 <sup>3</sup>Olomouc University Social Health Institute (OUSHI), Palacký University, Olomouc, Czech  
23  
24 12 Republic.  
25  
26 13

27 14  
28  
29 15  
30  
31  
32 16 Correspondence to: Dr. Ikenna D Ebuenyi; [Ikenna.ebuenyi@mu.ie](mailto:Ikenna.ebuenyi@mu.ie)  
33  
34  
35  
36  
37  
38  
39  
40  
41  
42  
43  
44  
45  
46  
47  
48  
49  
50  
51  
52  
53  
54  
55  
56  
57  
58  
59  
60

1  
2  
3  
4  
5  
6  
7  
8  
9  
10  
11  
12  
13  
14  
15  
16  
17  
18  
19  
20  
21  
22  
23  
24  
25  
26  
27  
28  
29  
30  
31  
32  
33  
34  
35  
36  
37  
38  
39  
40  
41  
42  
43  
44  
45  
46  
47  
48  
49  
50  
51  
52  
53  
54  
55  
56  
57  
58  
59  
60

1  
2  
3  
4  
5  
6  
7  
8  
9  
10  
11  
12  
13  
14  
15  
16  
17  
18  
19  
20  
21  
22  
23  
24  
25  
26  
27  
28  
29  
30  
31  
32  
33  
34  
35  
36  
37  
38  
39  
40  
41  
42  
43  
44  
45  
46  
47  
48  
49  
50  
51  
52  
53  
54  
55  
56  
57  
58  
59  
60

16 [Abstract](#)

17 [Introduction](#)

18 Assistive Technology (AT) is important for the achievement of the Sustainable Development Goals  
19 (SDGs) for persons with disabilities (PWD). Increasingly, studies suggest a significant gap  
20 between the need for and demand for and provisions of AT for PWD in low- and middle-income  
21 settings. Evidence from high income countries highlights the importance of robust AT policies to  
22 the achievement of the recommendations of the World Health Assembly on AT. In Malawi, there

For peer review only

1 is no standalone AT policy. The objectives of the priority Assistive Product list Implementation  
2 Creating Enablement of inclusive SDGs (APPLICABLE) project, are to propose and facilitate the  
3 development of a framework for creating effective national Assistive Technology (AT) policy and  
4 specify a system capable of implementing such policies in low-income countries such as Malawi.

### 5 **Method and analysis**

6 We propose an action research process with stakeholders in AT in Malawi. APPLICABLE will  
7 adopt an action research paradigm, through developing a shared research agenda with  
8 stakeholders and including users of AT. This involves the formation of an Action Research Group  
9 (ARG) that will specify the priorities for practice - and policy-based evidence, in order to facilitate  
10 the development of contextually realistic and achievable policy aspirations on AT in Malawi and  
11 provide system strengthening recommendations that will ensure that the policy is implementable  
12 for their realization. We will undertake an evaluation of this policy by measuring supply and support  
13 for specific AT prior to, and following the implementation of the policy recommendations.

### 14 **Ethics and Dissemination**

15 The study protocol was approved by Maynooth University Research Ethics Committee (SRESC-  
16 2019- 2378566) and University of Malawi Research Ethics Committee (P.01/20/10). Findings from  
17 the study will be disseminated by publication in peer-reviewed journals, presentations to  
18 stakeholders in Malawi, Ireland, and international audiences at international conferences.

19  
20 **Keywords:** Action Research, Assistive Technology Policy, Assistive Product List, Collective  
21 Leadership, Malawi

1  
2  
3 1  
4  
56 2 **Strength and Limitations of this Study**

8 3 ➤ This study will be the first in Africa to explore the development of a national Assistive  
9  
10 4 Technology policy and Assistive Product list in response to the recommendations of the  
11  
12 5 WHO.

15 6 ➤ The framework developed from this study, will lead to strengthening of the Assistive  
16  
17 7 Technology ecosystem in Malawi and may be relevant in other countries with similar  
18  
19 8 interest.

22 9 ➤ Using an emergent and action learning approach strengthens both the methods and  
23  
24 10 reflexivity of the research process and ensures active participation of all stakeholders.

27 11 ➤ The use of a flexible research methodology may lead to researcher bias and deviation from  
28  
29 12 the initial objectives may occur on account of the reliance on the contribution from multiple  
30  
31 13 stakeholders.

34 14 ➤ The proposed principle of collective leadership may be a hard sell to the stakeholders in  
35  
36 15 government who are used to the traditional single ministry lead in policy development.  
37  
38 16  
39  
40 17

## 1 Introduction

2 Persons with disabilities (PWD) often experience overt and covert barriers to participation in  
3 society and exercise of their rights.<sup>1</sup> These experiences of deprivation have dire implications  
4 for PWD, depending on their location and type of impairment. This realization has led to  
5 various efforts at both national and international level to ensure the reduction and elimination  
6 of the deprivation experience by PWD.<sup>1, 2</sup> The United Nations Convention on the Rights of  
7 Persons with Disabilities (UN CRPD) and the Sustainable Development Goals (SDGs)  
8 emphasize the importance of inclusion for PWD.<sup>3, 4</sup> The SDGs highlight the importance of  
9 social inclusion through the slogan- 'leave no one behind'.

10  
11 Assistive Technology (AT) is pivotal to achieving this mandate of inclusion of PWD.<sup>4, 5</sup> AT is a  
12 'subset of health technology systems and refers to "the development and application of  
13 organised knowledge, skills, procedures, and policies relevant to the provision, use, and  
14 assessment of assistive products".<sup>6</sup> while an assistive product is "any product (including  
15 devices, equipment, instruments, and software), either specially designed and produced or  
16 generally available, whose primary purpose is to maintain or improve an individual's  
17 functioning and independence and thereby promote their wellbeing".<sup>6</sup> Common examples of  
18 assistive products in different impairment domains include wheelchairs, white canes, hearing  
19 aids, communication boards and calendar pill boxes. In 2014, the WHO established the Global  
20 Cooperation on Assistive Technology (GATE) in order to address the global need for AT.<sup>7</sup>  
21 One of the first tasks for GATE was to establish a Priority Assistive Product List (APL)<sup>8</sup> which  
22 called for countries to develop their own context specific national APL, similar to the WHO

1  
2  
3 1 Essential medicines list.<sup>9</sup> The APL is not restrictive but a guide provided by GATE for countries  
4  
5  
6 2 to use in identifying national AT needs and priorities.<sup>8</sup>  
7  
8 3  
9  
10 4 In a bid to improve access to AT , GATE recommended five priority (5Ps) themes, namely  
11  
12  
13 5 people, policy, products, provision and personnel.<sup>8</sup> That schema put *people*, or users of AT,  
14  
15 6 at the centre and policy, products, provision and personnel, as strategic points of action to  
16  
17 7 improve access to AT around the world. In a series of position papers from the Global  
18  
19 8 Research, Innovation and Education on Assistive Technology (GREAT) summit organized by  
20  
21 9 GATE, people were identified as important drivers in AT access;<sup>10</sup> context sensitive products  
22  
23 10 were considered relevant for AT accessibility;<sup>11</sup> the development of an international standard  
24  
25 11 for provision of AT was seen as important for service user safety,<sup>12</sup> and the certification of  
26  
27 12 competency for AT personnel as important for staff training,<sup>13</sup> along with an inclusive  
28  
29 13 development of national AT policies, all to improve access to AT.<sup>14</sup> Along with these papers,  
30  
31 14 an additional 5 Ps – specifically referring to the context of AT services were also identified as  
32  
33 15 emergent from the discussions at the Summit (see Figure 1) The additional 5Ps include  
34  
35 16 Procurement, Place, Pace, Promotion and Partnership; and are key situational factors for  
36  
37 17 systems in diverse context. These situate the previous 5 Ps in national and local contexts that  
38  
39 18 determine access to AT. For instance, to ensure that *Procurement* or purchasing AT products  
40  
41 19 occur at national level in line with national and contextual factors that take into account *Place*  
42  
43 20 or differences in local settings; at a *Pace* that is feasible and can be absorbed within the  
44  
45 21 systems' capacity, using context sensitive methods to *promote* positive images of AT users  
46  
47 22 and with cross cutting *partnerships*.<sup>15</sup>  
48  
49  
50  
51  
52  
53  
54  
55  
56  
57  
58  
59  
60

1  
2  
3 1  
4  
5  
6 2 **Figure 1: The 10 Ps of Systems Thinking for Assistive Technology Adapted from MacLachlan**  
7  
8 3 **& Scherer, 2018, with permission)**  
9

10 4  
11  
12  
13 5 Sterman suggests that it is not a lack of resources, technical knowledge or commitment that  
14  
15 6 prevents us from making improvements in public health services but rather, “What thwarts us  
16  
17 7 is our lack of meaningful systems thinking capability”.<sup>16</sup> Specifically in relation to AT,  
18  
19 8 MacLachlan and Scherer argue that “a systems thinking approach allows for a meaningful  
20  
21 9 linking of components and processes, a more realistic understanding of why and where  
22  
23 10 initiatives might fail or succeed, and a more satisfying way of placing the user of assistive  
24  
25 11 technology at the centre of ideas, activities and outcomes.”<sup>15</sup>  
26  
27  
28  
29  
30  
31

32 13 **The Malawi Context**  
33

34 14 Increasingly, studies suggest low demand and provision of Assistive Technology (AT) for  
35  
36 15 PWD in low- and middle-income settings.<sup>17</sup> Malawi is a Southern African country with a  
37  
38 16 population of about 18 million. The economy is largely agrarian, and the government depends  
39  
40 17 on foreign aid. Malawi ranks 172 out 189 countries based on the United Nations Human  
41  
42 18 Development Index.<sup>18</sup> In Malawi, there are several policies and strategies at the national level  
43  
44 19 which are relevant to the experiences of PWD, each which should have relevance to AT.  
45  
46 20 Notably, the National Policy on the Equalization of Opportunities for PWD <sup>19</sup> and National  
47  
48 21 Disability Mainstreaming Strategy and Implementation Plan;<sup>20</sup> yet there are no clear direction  
49  
50 22 guidelines on how AT should be provided in the country <sup>20</sup>. It is pertinent to state that the  
51  
52  
53  
54  
55  
56  
57  
58  
59  
60



1  
2  
3 1 National Policy on the Equalization of Opportunities for Persons with Disabilities was adopted  
4  
5  
6 2 in 2006; and processes are underway to develop a successor plan on account of its expiration.  
7  
8 3 In Malawi, there is a huge gap between the need and access to services PWD.<sup>21</sup> Although  
9  
10 4 about 69% of PWD need assistive devices in Malawi, only 5% have access to them.<sup>22</sup>  
11  
12  
13 5 Evidence from high income countries highlights the importance of robust AT policies for the  
14  
15 6 achievement of the recommendations of the WHA on AT.<sup>23</sup> In Malawi, there is no standalone  
16  
17 7 AT policy.<sup>24</sup>  
18  
19  
20  
21  
22

23 9 The objectives of the Assistive Product List Implementation Creating Enablement of inclusive  
24  
25 10 SDGs (APPLICABLE) project are (i) to propose and facilitate the development of *a framework*  
26  
27 11 for creating effective national Assistive Technology (AT) policy and (ii) *specify a system*  
28  
29  
30 12 capable of implementing that policy in Malawi.  
31  
32

### 33 13 [Methods and Analysis](#)

#### 34 14 [Approach](#)

35  
36  
37 15 The study will adopt an action research approach<sup>25</sup> and shared research agenda in  
38  
39 16 collaboration with AT stakeholders in Malawi to achieve the study objectives. Hence, this  
40  
41 17 research protocol is based on a proposed research plan by the research teams at Maynooth  
42  
43  
44 18 University and the University of Malawi and the discussions held during the project launch and  
45  
46 19 formation of an Action Research Group (ARG) in Malawi.  
47  
48  
49 20 The relevance of action research for solving persistent problems has been extensively reported.<sup>25</sup>  
50  
51 21 Boger et al recommend collaborative transdisciplinary approach for solving persistent problems  
52  
53 22 in AT.<sup>26</sup> In adopting this method, we aim to ensure that the process of AT policy development is  
54  
55  
56 23 participatory, collaborative and undertaken through a transparent and reflexive process with  
57  
58  
59  
60

1 relevant stakeholders in Malawi. Equally essential is the relevance of the action research paradigm  
2 to the systems-thinking and mission-oriented approach which are central to the objectives of  
3 APPLICABLE. A systems thinking approach will ensure APPLICABLE focuses on the range of  
4 Ps (described above) to bridge the AT systems Gap in Malawi.<sup>15, 27</sup> 'Collective leadership'<sup>28, 29</sup> will  
5 be a guiding principle for the research, whereby all the participating ministries and other major  
6 stakeholders, take active leadership in the project in order to engender collective impact which is  
7 supported by research. Collective leadership refers to a group of people working together to  
8 achieve a set goal.<sup>28, 29</sup> In this case, we envision co-construction of leadership and shared  
9 responsibility by different stakeholders involved in AT in Malawi.<sup>30</sup> According to De Bruin et al.,  
10 collective leadership was associated with improved communication and role clarity, greater  
11 willingness to adopt leadership roles and 'give and take' by leaders, who became more willing to  
12 share leadership responsibilities.<sup>28</sup> Also, Michaud-Létourneau suggest that the approach is useful  
13 for changing policy where many stakeholders exist.<sup>29</sup> We will strive to minimize power imbalances  
14 and the pitfalls of collective leadership by continuous learning and knowledge sharing to co-  
15 construct what works for everyone through reflective dialogues.<sup>31</sup>

16  
17  
18 The specific research methods described below are tactical and will be decided with the ARG in  
19 an iterative process through a series of five phases, each comprised of Action Research Cycles.  
20 The content for each of those action research cycles will be decided with key stakeholders in AT  
21 in Malawi through the formation of an ARG.

22

1  
2  
3  
4 1  
5 2 **Formative Research**  
6  
7 3 Prior to the project launch, a series of steps were undertaken as part of the formative research  
8  
9 4 process. Initial meetings were held with the Ministries of Gender, Children, Disability and Social  
10  
11 5 Welfare (MoGCD&SW), Health, Education, and Labour, Disabled People's Organisations, other  
12  
13 6 civil society, service providers, donors, industry and UN agencies. Presentation and discussions  
14  
15 7 on establishing a AT policy and implementation systems in Malawi were discussed and the  
16  
17 8 stakeholders expressed interest in the 36 months (January 2019-December 2021) project.

19 9 The project launch was held on the 6<sup>th</sup> of December 2019 with over 40 stakeholders drawn from  
20  
21 10 five broad stakeholder groups namely:

- 26 11 1. Government Stakeholders (e.g. Ministries of Health, Education, Gender and Persons with  
27  
28 12 Disabilities and the Elderly)
- 31 13 2. Non-governmental non-profit stakeholders (e.g. Federation of Disability Organization in  
32  
33 14 Malawi (FEDOMA), Beit Cure International Hospital (BT), Malawi Council for the  
34  
35 15 Handicapped (MACOHA))
- 38 16 3. Non-governmental for-profit stakeholders (Pharmacist, Physiotherapist)
- 40  
41 17 4. Academic Institutions
- 42  
43 18 5. United Nation agencies (e.g. UNICEF, WHO, UNDP)

45 19 It is pertinent to state that persons with disabilities and users AT products are not restricted to only  
46  
47 20 group two but are also in the other groups. They are involved in all the research processes and  
48  
49 21 as part of the ARG.

52 22 The formative research stage describes activities undertaken prior to the project launch. The  
53  
54 23 following sections describe the proposed research phases developed following the project launch.

1  
2  
3  
4 1  
5  
6 2 **Research Phases**  
7  
8 3 The study will be conducted in five phases. The details of each phase will be collaboratively  
9  
10 4 decided during the action research project, but these phases will guide the work throughout the  
11  
12 5 project.

13  
14 6 The five phases of the research are Preparatory Work, Policy Development, Systems  
15  
16 7 Development, Implementation and Evaluation, and Knowledge Exchange (Figure 2).  
18  
19 8

20  
21  
22 9  
23  
24 10 **Figure 2: APPLICABLE research phases**  
25  
26 11

27  
28  
29 12 *Phase 1- Preparatory Work.* This stage starts with the project launch and formation of the Action  
30  
31 13 Research Group (ARG). Following the project launch, 15 persons were invited from the  
32  
33 14 stakeholders present to join the ARG. Members of the ARG have been purposively selected to  
34  
35 15 work on the policy development and implementation.

36  
37  
38 16 The ARG adopted the proposed process and agreed that:

- 39  
40  
41 17
  - A realistic AT policy and delivery system is needed in Malawi; and
  - That ownership of the policy will be further discussed and that initially it will be co-led by

42  
43 18 members of the Action Research Group; and

44  
45 19

  - Data will be stored at the Centre for Social Research, Malawi.

46  
47  
48 20

49  
50 21 The launch was organized in collaboration with Clinton Health Access Initiative (CHAI) who  
51  
52 22 previously conducted a baseline survey on AT in Malawi. They presented the results on their  
53  
54 23 survey, after which APPLICABLE was introduced by the Principal investigators from Malawi and

1  
2  
3 1 Ireland. This was followed by reactions from stakeholders and selection of the ARG from the  
4  
5  
6 2 stakeholders' present. The discussions with the ARG, informed the proposed research phases  
7  
8 3 (Table 1):  
9

10 4  
11  
12  
13 5 The nature of action research is that the methodology of the group is decided upon by the group  
14  
15 6 and is likely to change and evolve as they address different issues.<sup>25</sup> Following an action research  
16  
17 7 approach, the group will thus **plan** what to do – take clear and specific **action** – **observe** and collect  
18  
19 8 data on the consequences of this action – and as a group **reflect** on the implications for designing  
20  
21 9 policy to and systems to promote access to AT. In order to conduct preparatory work, we will  
22  
23 10 conduct a literature review of academic and grey literature in assistive technology in Malawi and  
24  
25 11 review data available from existing datasets. In addition, we will conduct interviews with users and  
26  
27 12 providers of AT guided by the data from a Country Capacity assessment by the Clinton Health  
28  
29 13 Access Initiative (CHAI) in partnership with the Assistive Technology 2030 project. The research  
30  
31 14 team will also assess inclusivity of the process of policy development and implementation in  
32  
33 15 existing policies using the EquIPP (Equity and Inclusion in Policy Processes) tool.<sup>32</sup> The EquIPP  
34  
35 16 <sup>32</sup> tool was developed with the United Nations Partnership on the Rights of Persons with  
36  
37 17 Disabilities (UNPRPD) and measures, evaluates and makes recommendations for improvement  
38  
39 18 in regard to inclusive policy development and evaluation. It consists of 17 Key Actions that provide  
40  
41 19 guidance on how to ensure an equitable and inclusive policy development process.  
42  
43  
44  
45  
46  
47  
48  
49  
50

51 21 Phase 2 – Policy Development: Phase 2 will focus on the development of a draft policy, guided by  
52  
53 22 the EquIPP framework for inclusive policy development. A theory of change<sup>33</sup> will be undertaken  
54  
55  
56  
57  
58  
59  
60

1  
2  
3 1 to guide the APL development while Force Field Analysis<sup>34</sup> to explore the political economy and  
4  
5  
6 2 power relationships on AT in Malawi will be conducted. Force Field Analysis<sup>34</sup> is a qualitative  
7  
8 3 research method that conceptualises how forces for and against change are poised and thus  
9  
10 4 helps in the systematic analysis of possible change processes. Bourdesian Analysis<sup>35</sup> applies  
11  
12 5 the idea of the social space being composed of fields of identify and power relations which are  
13  
14  
15 6 likely to influence change process.  
16  
17  
18 7

19  
20 8 The ARG will design a Draft AT Policy, supported by the research team, drawing on the literature  
21  
22 9 reviewed above and taking into account the Malawian context. It is anticipated that the resultant  
23  
24  
25 10 draft may also be assessed for the degree to which it promotes inclusivity (e.g. service users,  
26  
27 11 gender, rurality, poverty, etc.) using the EquiFrame tool.<sup>36</sup> EquiFrame<sup>36</sup> which is a tool for  
28  
29  
30 12 Evaluating and Promoting the Inclusion of Vulnerable Groups and Core Concepts of Human  
31  
32 13 Rights in Health Policy Documents. It consists of 21 Core Concepts that covers issues relating to  
33  
34  
35 14 universal, equitable and accessible healthcare.  
36  
37  
38  
39  
40  
41  
42  
43

44 17 *Phase 3-System Development:* This phase involves the development of system strengthening  
45  
46 18 recommendations based on knowledge and information generated from the policy development  
47  
48 19 process. The ARG will also address what implications there are at the systems level for delivering  
49  
50 20 on the Draft AT Policy; and to recommend how these can be addressed in the Malawian context.  
51  
52 21 Data will be used to demonstrate the link between the different government ministries and  
53  
54 22 stakeholders to the SDG matrix; and thus highlight the relevance of AT to achievement of the  
55  
56  
57  
58  
59  
60

1  
2  
3 1 SDGs.<sup>4</sup> The SDG Matrix will be used to demonstrate the concept that that assistive products have  
4  
5  
6 2 a direct impact on the achievement of the SGDs. Tebbutt and colleagues suggest that assistive  
7  
8 3 products can be both mediators and moderators of SDG achievement <sup>5</sup> A network analysis<sup>37, 38</sup>  
9  
10 4 will be undertaken to explore the strength and nature of relationship between stakeholders on AT  
11  
12  
13 5 in Malawi. The collective leadership approach will be very useful in this phase to ensure collective  
14  
15 6 impact and system development.<sup>39</sup>  
16  
17  
18 7

19  
20 8 *Phase 4- Implementation and Evaluation.* This phase marks the beginning of the implementation  
21  
22 9 and evaluation of the AT policy developed. Over an agreed period, the participating government  
23  
24  
25 10 ministries and stakeholders will identify a suitable service provider to trial the implementation of  
26  
27 11 the Draft AT Policy, with the support of the identified ministry and the research team. While the  
28  
29  
30 12 ARG will be in a continuing process of evaluation and feedback themselves, stakeholders who  
31  
32 13 attended the project launch will be asked to attend a project review meeting where the ARG and  
33  
34 14 research team will present findings. The ARG will also identify AT service users to present their  
35  
36  
37 15 experiences during this workshop. The SMART (Systems-Market for Assistive and Related  
38  
39 16 Technologies) Thinking Matrix framework will be used during the implementation and  
40  
41  
42 17 evaluation.<sup>40</sup> The SMART Thinking Matrix is a framework for conceptualizing intersections  
43  
44 18 between systems levels and market shaping for assistive technology and was derived form a  
45  
46 19 systematic review of the interface between these two literatures.<sup>40</sup>  
47  
48  
49 20

50  
51 21 *Phase 5-Knowledge Exchange.* This phase entails ensuring knowledge exchange impact of the  
52  
53  
54 22 research process. The ARG and the Research Team will use results from previous phases to  
55  
56  
57  
58  
59  
60

1 identify key features that might be relevant for a generic National Framework for AT, that will be  
2 generalised to other countries and contexts. In keeping with Action Research methodology, expert  
3 advisers (all of whom we have worked with before) who will be available to provide support to the  
4 ARG shall provide feedback on the research process. This support could be provided either  
5 virtually or through attendance at project meeting in Malawi; as determined by the needs of the  
6 ARG and the available budget of the project.

### 8 Action Research Methodology

9 Throughout the five phases described above, we will use an Action Research Methodology<sup>25</sup>  
10 informed by the needs of the ARG. This will take the form of Action Research Cycles each  
11 consisting of four components: plan, act, observe, and reflect (Figure 3), to answer the research  
12 questions which are posed by the ARG, and contribute to the development of each phase.

### 16 **Figure 3. Action Research Process**

18 Throughout these cycles, we will use multiple study methods to address the questions posed by  
19 the ARG (Table 1). For each research methodology, specific study procedures (Table 1) to  
20 produce requested content for use in the action research cycle will be decided with the ARG.



1

2 **Table 1: Planned and anticipated research methodology**

| Research Phase                                                                                | Methodology                                                                                                                                                                                                                                                                                                                                                                                                                                                                                                                 |
|-----------------------------------------------------------------------------------------------|-----------------------------------------------------------------------------------------------------------------------------------------------------------------------------------------------------------------------------------------------------------------------------------------------------------------------------------------------------------------------------------------------------------------------------------------------------------------------------------------------------------------------------|
| <b>Phase 1 - Preparatory Work: Understanding the Assistive technology context in Malawi</b>   | <ol style="list-style-type: none"> <li>1. <b>Literature Review:</b> Assistive technology service delivery and policy review using academic and grey literature</li> <li>2. <b>Data Review:</b> Secondary data analysis of existing datasets (i.e. Census, SINTEF dataset) and interviews</li> <li>3. <b>Country Capacity Assessment:</b> In collaboration with AT2030 and the Clinton Health Access Initiative</li> <li>4. <b>EquiPP:</b> Review of existing policies for inclusive policy development processes</li> </ol> |
| <b>Phase 2 – Policy Development: Identifying Key Change Agents and Contexts</b>               | <ol style="list-style-type: none"> <li>5. <b>EquiPP:</b> Inclusive policy development process</li> <li>6. <b>Theory of Change:</b> Development of theory of change for APL development</li> <li>7. <b>Field Analysis:</b> Force Field Analysis and Bourdesian Analysis to understand political economy and power relationships</li> </ol>                                                                                                                                                                                   |
| <b>Phase 3 - Systems Development: Engagement in Collective Leadership to Achieve the SDGs</b> | <ol style="list-style-type: none"> <li>8. <b>SDG Matrix:</b> Linking ministries to SDG achievement and role of AT</li> <li>9. <b>Network Analysis:</b> Strength and nature of existing networks between key stakeholders in AT in Malawi</li> </ol>                                                                                                                                                                                                                                                                         |
| <b>Phase 4 – Implementation and Evaluation: Delivering a Policy</b>                           | <ol style="list-style-type: none"> <li>10. <b>Systems Coherence Development:</b> Addressing gaps in existing network to strengthen coherence for GATE 10Ps</li> <li>11. <b>Market Shaping Analysis:</b> Smart Thinking Matrix</li> </ol>                                                                                                                                                                                                                                                                                    |

|                                                                                      |                                                                                                                                                                                                                                           |
|--------------------------------------------------------------------------------------|-------------------------------------------------------------------------------------------------------------------------------------------------------------------------------------------------------------------------------------------|
| <p><b>or Strategy in Context</b></p>                                                 | <p>12. <b>Piloting:</b> Implementation of strategy in key areas with review of process and outcomes</p>                                                                                                                                   |
| <p><b>Phase 5 – Knowledge Exchange: Applying Knowledge to the Global Context</b></p> | <p>13. <b>Policy Framework:</b> Identification of key concepts for broader applicability to other contexts</p> <p>14. <b>Systems Implementation Framework:</b> Specification of implementation system to be applied to other contexts</p> |

## Data collection and Management

All data including the transcripts will be stored according to the provisions of the Centre for Social Research, University of Malawi Research Practice and Procedures. Hence, all primary data will be held permanently following its acquisition and used in publication for the purpose of this study and recommendations of the ARG. All data will be anonymized, and informed consent will be obtained from all study participants and stakeholders at every stage of the research process. Study participants entail all who are recruited or invited to participate in the study and may include stakeholders who are users or providers of AT. A data dictionary will be kept and maintained for both quantitative and qualitative data to ensure that all authorized individuals are able to reuse the data. Secondary data will be obtained from National the Statistics Office and National Survey on living conditions of persons with disabilities (SINTEF).

## Data Analysis

The data analysis method adopted will be dependent on the data type from the different phases of the study. Quantitative data will be reported according to the Strengthening the Reporting of Observational Studies in Epidemiology (STROBE) guidelines while qualitative data will be

1  
2  
3 1 reported using the Consolidated Criteria for Reporting Qualitative Research (COREQ).<sup>41</sup> Analytic  
4  
5 2 review methods will be used for literature and document review in phases 1 and 5.<sup>42</sup> For qualitative  
6  
7 3 data (From phases 1-5), content and framework analysis will be used. Both deductive and  
8  
9 4 inductive methods will be adopted by the research team to code available data, depending on the  
10  
11 5 nature of data and question posed by the ARG. Data coding will be conducted by independent  
12  
13 6 members of the research team and assessed for congruence, with differences resolved by the  
14  
15 7 research team. A process of thematic analysis will be subsequently used to identify main and sub  
16  
17 8 themes relevant for the study. For quantitative data (Phase 1, 2 and 3), descriptive statistics and  
18  
19 9 regression analysis will be undertaken to understand factors relevant for improved access to AT  
20  
21 10 and creation of a nation AT policy in Malawi.<sup>42</sup>

22  
23 11 The EquIPP and EquiFrame tools<sup>32, 36</sup> will also be used to analyze existing policy on disability and  
24  
25 12 the proposed AT policy. Quantitative data will be analysed using the Statistical Package for the  
26  
27 13 Social Sciences (SPSS) version 23 while qualitative data will be analysed via *Atlas. ti version*  
28  
29 14 *7.5.18*. All data will be anonymized and not contain any personal identifiers.

### 30 31 32 33 34 35 36 37 38 39 16 Patient and Public Involvement

40  
41 17 Stakeholders that include users or providers of Assistive Technology were involved in the  
42  
43 18 formative research process. These stakeholders who are also part of the ARG will be involved  
44  
45 19 in all stages of the research including the dissemination of the results from the study.  
46  
47  
48  
49  
50  
51  
52  
53  
54  
55  
56  
57  
58  
59  
60

## 1 Ethics and Dissemination

2 Ethical approval was obtained from the Maynooth University Social Research Ethics Committee  
3 (SRESC-2019- 2378566) and University of Malawi Research Ethics Committee (UNIMAREC)  
4 (P.01/20/10).

5 The results from the study will be disseminated through presentations at conferences both  
6 within Malawi and abroad with stakeholders in and at international conferences; and publishing  
7 in peer-reviewed journals and on the websites of Maynooth and University of Malawi

## 9 Discussion

10 The aim of APPLICABLE is to develop a national AT policy for Malawi and to contribute to the  
11 development of a framework in the process that may be relevant in other countries. Also, it is  
12 anticipated that the process will evolve a framework that will lead to strengthening of the AT  
13 ecosystem through collaborative action and partnership with all stakeholders.

14  
15 These objectives informed the adoption of the Action Research approach that sets out on a  
16 research path without specific research agenda but entrusts the direction of the research to  
17 local and informed actors on AT in Malawi, to ensure a shared research agenda and  
18 development of context useful knowledge. This approach is in line with the ethos of the Mission  
19 Oriented Approach for AT proposed by Albala and colleagues.<sup>27</sup> It also avoids the common  
20 pitfall of most implementation research, where research is done for rather than with local  
21 stakeholders. Also, the action research approach ensures the development of context specific  
22 approaches for the development of APL for Malawi. Low income settings like Malawi have  
23 particular AT challenges that must take into consideration the local realities rather than

1  
2  
3 1 adopting recommendations from high income settings with different socio-economic milieu.  
4  
5  
6 2 According to Gélinas-Bronsard and colleagues, accessing AT is a matter of resources.<sup>30</sup> While  
7  
8 3 it is obvious that factors outside finance play a role in the access and utilization of AT, its  
9  
10 4 pivotal role in LMICS, where health care insurance and social welfare packages are absent,  
11  
12  
13 5 is a key issue that the action research approach must explicitly address.  
14

15 6  
16  
17 7 The Collective Leadership approach will help to ensure all stakeholders engaged in the action  
18  
19 8 research approach feel a sense of ownership and promote buy-in at all levels in the  
20  
21 9 implementation phase. Historically, in Malawi and in other countries, a single ministry  
22  
23 10 maintains responsibility for the development and implementation of policy – considered the  
24  
25 11 policy holder. In this case, either the ministry of Health or Gender and disability or Education  
26  
27 12 may desire to claim ownership on account of perceived ‘proximity’ of AT to their ministry.  
28  
29 13 However, AT is more than just a health issue, or disability problem as shown by data from our  
30  
31 14 SDG matrix. It cuts across various sectors such as education, sports and therefore require  
32  
33 15 collaborative approach. As shown by Tebbut and colleagues, AT is relevant for the  
34  
35 16 achievement of each of the 17 SDGs;<sup>5</sup> hence requires cross cutting collaboration between all  
36  
37 17 players in Malawi. Interestingly, the collective leadership approach is noted to be useful for  
38  
39 18 changing policy where many stakeholders exist and led to relevant policy changes in infant  
40  
41 19 and young child feeding policies in seven countries in Southeast Asia.<sup>29</sup> Similarly, a systematic  
42  
43 20 review by De Brun and colleagues showed that collectivistic leadership was associated  
44  
45 21 positive outcomes in health care settings in Europe and North America.<sup>28</sup> It is pertinent to note  
46  
47 22 that in order to solve social problems and achieve collective impact, commitment of all relevant  
48  
49  
50  
51  
52  
53  
54  
55  
56  
57  
58  
59  
60

1 actors is crucial<sup>39</sup>. This integration between systems thinking and market shaping approach  
2 presents as practical and viable option to increase access to AT.<sup>40</sup>  
3  
4 The strength of this study lies in its reliance on the Action Research method which ensures active  
5 participation of all stakeholders. Yet, the task of managing the interest of the 'many' and ensuring  
6 that every opinion '*counts*' may be the big challenge of the research process. We hope to address  
7 these through action learning and transdisciplinary approaches recommended for use in assistive  
8 technology projects.<sup>26</sup>  
9  
10  
11  
12 Gaps between research and practice or policy and practice gaps are some of the persistent  
13 problems in disability studies. In adopting an action research process, we intend to avoid these  
14 gaps to evolve a participatory and innovative process leading to development of an implementable  
15 AT policy in Malawi. The benefits of an AT policy in Malawi are numerous. However, a realistic  
16 and implementable policy would overcome the limitations of past policies on disability in Malawi  
17 that failed to address the health and social challenges of PWD. APPLICABLE presents as an  
18 opportunity to demonstrate an innovative and participatory way of policy development that may  
19 be adapted for use in other settings.  
20  
21  
22

## 20 Acknowledgement

21 We are grateful to the members of APPLICABLE action research group and all stakeholders  
22 involved in the formative research process.

## 1 Author Contributions

2 IDE and MM conceptualized the protocol with significant contributions from EMS and AM. IDE  
3 wrote the initial draft which was reviewed by EMS, JK, MZJ, AM and MM. All authors read and  
4 approved the final version of the manuscript.

## 6 Funding

7 This work was supported by funding from the Irish Research Council (IRC) grant number-  
8 COALESCE/2019/114.

## 10 Competing interests

11 None declared.

1  
2  
3  
4  
5  
6  
7  
8  
9  
10  
11  
12  
13  
14  
15  
16  
17  
18  
19  
20  
21  
22  
23  
24  
25  
26  
27  
28  
29  
30  
31  
32  
33  
34  
35  
36  
37  
38  
39  
40  
41  
42  
43  
44  
45  
46  
47  
48  
49  
50  
51  
52  
53  
54  
55  
56  
57  
58  
59  
60

1  
2  
3  
4  
5  
6

For peer review only





- 1  
2  
3 1 on assistive technology (GREAT) summit. *Disability and Rehabilitation: Assistive Technology*.  
4  
5  
6 2 2018;13(5):437-44.  
7
- 8 11. Smith RO, Scherer MJ, Cooper R, Bell D, Hobbs DA, Pettersson C, et al. Assistive  
9  
10 4 technology products: a position paper from the first global research, innovation, and education on  
11  
12 5 assistive technology (GREAT) summit. *Disability and Rehabilitation: Assistive Technology*.  
13  
14 6 2018;13(5):473-85.  
15
- 16 12. de Witte L, Steel E, Gupta S, Ramos VD, Roentgen U. Assistive technology provision:  
17  
18 8 towards an international framework for assuring availability and accessibility of affordable high-  
19  
20 9 quality assistive technology. *Disability and Rehabilitation: Assistive Technology*. 2018;13(5):467-  
21  
22 10 72.  
23  
24  
25
- 26 13. Smith EM, Gowran RJ, Mannan H, Donnelly B, Alvarez L, Bell D, et al. Enabling  
27  
28 12 appropriate personnel skill-mix for progressive realization of equitable access to assistive  
29  
30 13 technology. *Disability and Rehabilitation: Assistive Technology*. 2018;13(5):445-53.  
31  
32  
33
- 34 14. MacLachlan M, Banes D, Bell D, Borg J, Donnelly B, Fembek M, et al. Assistive technology  
35  
36 15 policy: a position paper from the first global research, innovation, and education on assistive  
37  
38 16 technology (GREAT) summit. *Disability and Rehabilitation: Assistive Technology*. 2018;13(5):454-  
39  
40 17 66.  
41  
42  
43
- 44 15. MacLachlan M, Scherer MJ. Systems thinking for assistive technology: a commentary on  
45  
46 19 the GREAT summit. *Disability and Rehabilitation: Assistive Technology*. 2018;13(5):492-6.  
47  
48
- 49 16. Sterman JD. Learning from evidence in a complex world. *American journal of public health*.  
50  
51 21 2006;96(3):505-14.  
52  
53  
54  
55  
56  
57  
58  
59  
60

- 1  
2  
3 1 17. Holloway C, Austin V, Barbareschi G, Ramos F. Scoping Research Report on Assistive  
4  
5  
6 2 Technology. On the road for universal assistive technology coverage Prepared by the GDI Hub &  
7  
8 3 partners for the UK Department for International Development Global Disability Innovation Hub.  
9  
10 4 2018.  
11  
12  
13 5 18. United Nations. Malawi 2020 [Available from: <http://mw.one.un.org/country-profile/>.  
14  
15 6 19. National Policy on Equalisation of Opportunities for Persons with Disabilities (2006).  
16  
17 7 20. Malawi Government. National Disability Mainstreaming Strategy and Implementation Plan  
18  
19 8 2018 - 2023. Lilongwe, Malawi; 2018.  
20  
21  
22 9 21. Loeb M, Eide AH. Living Conditions among people with activity limitations in Malawi. A  
23  
24 10 national representative study. SINTEF Rapport. 2004.  
25  
26  
27 11 22. Munthali AC. A situation analysis of persons with disabilities in Malawi. 2011.  
28  
29  
30 12 23. World Health Organization. Global perspectives on assistive technology: proceedings of  
31  
32 13 the GReAT Consultation 2019, World Health Organization, Geneva, Switzerland, 22–23 August  
33  
34 14 2019. Volume 1. 2019.  
35  
36  
37 15 24. Ngomwa PMG. Discourse on Intellectual Disability and Improved Access to Assistive  
38  
39 16 Technologies in Malawi. *Frontiers in public health*. 2018;6:377.  
40  
41  
42 17 25. Coghlan D, Brydon-Miller M. *The SAGE encyclopedia of action research*: Sage; 2014.  
43  
44 18 26. Boger J, Jackson P, Mulvenna M, Sixsmith J, Sixsmith A, Mihailidis A, et al. Principles for  
45  
46 19 fostering the transdisciplinary development of assistive technologies. *Disability and Rehabilitation:*  
47  
48 20 *Assistive Technology*. 2017;12(5):480-90.

- 1  
2  
3  
4 1 27. Albala S, Holloway C, MacLachlan M, Banes D, Bandukda R, Walker J, et al. 'Capturing  
5  
6 2 and Creating Value in the Assistive Technologies Landscape through a Mission-Oriented  
7  
8 3 Approach: A New Research and Policy Agenda' AT2030 Working Paper Series (1).  
9  
10 4 28. De Brún A, O'Donovan R, McAuliffe E. Interventions to develop collectivistic leadership in  
11  
12 5 healthcare settings: a systematic review. *BMC health services research*. 2019;19(1):72.  
13  
14 6 29. Michaud-Létourneau I, Gayard M, Mathisen R, Phan LTH, Weissman A, Pelletier DL.  
15  
16 7 Enhancing governance and strengthening advocacy for policy change of large Collective Impact  
17  
18 8 initiatives. *Maternal & child nutrition*. 2019;15:e12728.  
19  
20 9 30. Gélinas-Bronsard D, Mortenson WB, Ahmed S, Guay C, Auger C. Co-construction of an  
21  
22 10 Internet-based intervention for older assistive technology users and their family caregivers:  
23  
24 11 stakeholders' perceptions. *Disability and Rehabilitation: Assistive Technology*. 2019;14(6):602-11.  
25  
26 12 31. Raelin JA. What are you afraid of: Collective leadership and its learning implications.  
27  
28 13 *Management Learning*. 2018;49(1):59-66.  
29  
30 14 32. Huss T, MacLachlan M. Equity and Inclusion in Policy Processes (EquIPP): a framework  
31  
32 15 to support equity & inclusion in the process of policy development, implementation and evaluation:  
33  
34 16 *Global Health Press*; 2016.  
35  
36 17 33. Mason P, Barnes M. Constructing theories of change: Methods and sources. *Evaluation*.  
37  
38 18 2007;13(2):151-70.  
39  
40 19 34. Harrington HJ. Force Field Analysis. *The Innovation Tools Handbook, Volume 2:*  
41  
42 20 *Evolutionary and Improvement Tools that Every Innovator Must Know*. 2016.  
43  
44 21 35. Bourdieu P. *The Social Space and the Genesis of Groups Theory and Society*. 1985.  
45  
46  
47  
48  
49  
50  
51  
52  
53  
54  
55  
56  
57  
58  
59  
60

- 1  
2  
3 1 36. Amin M, MacLachlan M, Mannan H, El Tayeb S, El Khatim A, Swartz L, et al. EquiFrame:  
4  
5  
6 2 A framework for analysis of the inclusion of human rights and vulnerable groups in health policies.  
7  
8 3 Health Hum Rights. 2011;13(2):1-20.  
9  
10 4 37. Loitz CC, Stearns JA, Fraser SN, Storey K, Spence JC. Network analysis of inter-  
11  
12 5 organizational relationships and policy use among active living organizations in Alberta, Canada.  
13  
14 6 BMC public health. 2017;17(1):649.  
15  
16 7 38. Ryan D, Emond M, Lamontagne M-E. Social network analysis as a metric for the  
17  
18 8 development of an interdisciplinary, inter-organizational research team. Journal of  
19  
20 9 interprofessional care. 2014;28(1):28-33.  
21  
22  
23 10 39. Kania J, Kramer M. Collective impact: FSG; 2011.  
24  
25 11 40. MacLachlan M, McVeigh J, Cooke M, Ferri D, Holloway C, Austin V, et al. Intersections  
26  
27 12 Between Systems Thinking and Market Shaping for Assistive Technology: The SMART (Systems-  
28  
29 13 Market for Assistive and Related Technologies) Thinking Matrix. Int J Environ Res Public Health.  
30  
31 14 2018;15(12):2627.  
32  
33  
34 15 41. Network E. Enhancing the quality and transparency of health research. Available at: www  
35  
36 16 equator-network.org Accessed February. 2014;10.  
37  
38  
39 17 42. Gray DE. Doing research in the real world: Sage; 2013.  
40  
41  
42  
43  
44  
45  
46  
47  
48  
49  
50  
51  
52  
53  
54  
55  
56  
57  
58  
59  
60



The 10 Ps of Systems Thinking for Assistive Technology Adapted from MacLachlan & Scherer, 2018, with permission)

235x132mm (144 x 144 DPI)

1  
2  
3  
4  
5  
6  
7  
8  
9  
10  
11  
12  
13  
14  
15  
16  
17  
18  
19  
20  
21  
22  
23  
24  
25  
26  
27  
28  
29  
30  
31  
32  
33  
34  
35  
36  
37  
38  
39  
40  
41  
42  
43  
44  
45  
46  
47  
48  
49  
50  
51  
52  
53  
54  
55  
56  
57  
58  
59  
60



APPLICABLE research phases  
338x190mm (96 x 96 DPI)



Action Research Process

338x190mm (96 x 96 DPI)
